# Supplementary material for: Temporal Profiling of Host Proteome against Different M. tuberculosis Strains Reveals Delayed Epigenetic Orchestration
Source: MDPI journal article supplement (doi:10.3390/microorganisms11122998), 2023-12-16

Figure S1

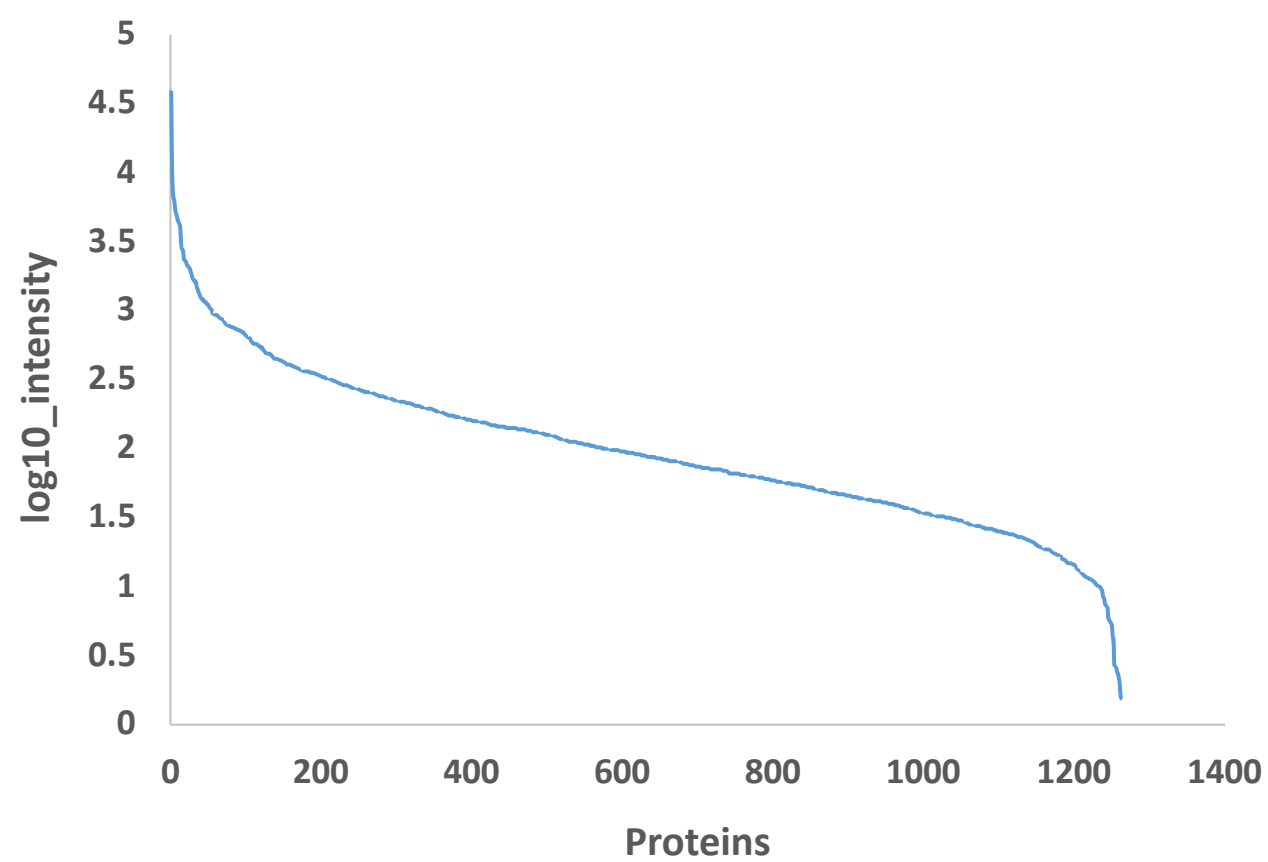

Differential proteins

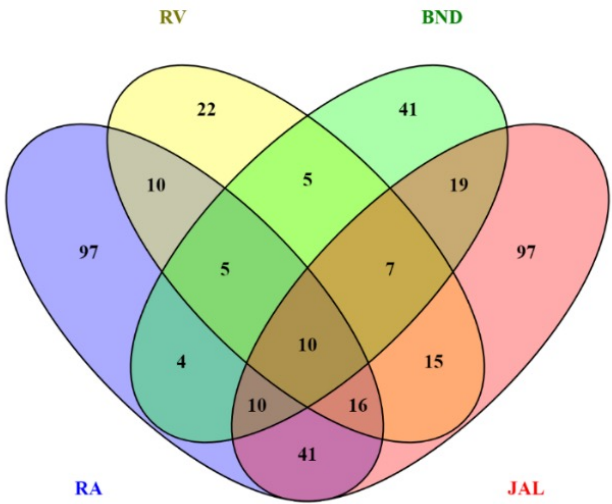

Common virulent

Unique unshared

| Rv-BND | Rv-JAL | BND-JAL | Rv-BND-JAL | Ra | Rv | BND | JAL |
|--------|--------|---------|------------|----|----|-----|-----|
| 5      | 15     | 19      | 7          | 97 | 22 | 41  | 97  |

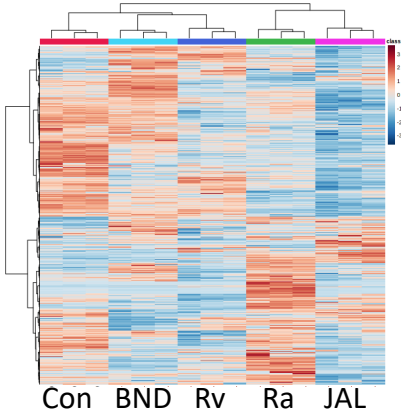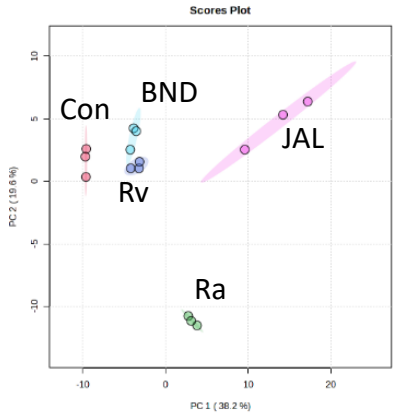

Up-regulated proteins

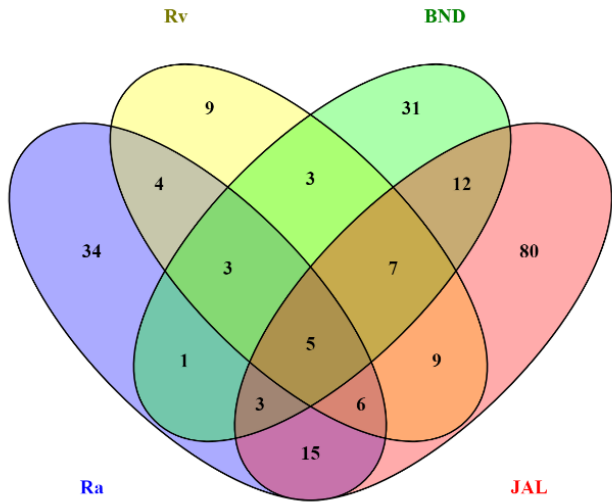

Common virulent

Unique unshared

| Rv-BND | Rv-JAL | BND-JAL | Rv-BND-JAL | Ra | Rv | BND | JAL |
|--------|--------|---------|------------|----|----|-----|-----|
| 3      | 9      | 12      | 7          | 34 | 9  | 31  | 80  |

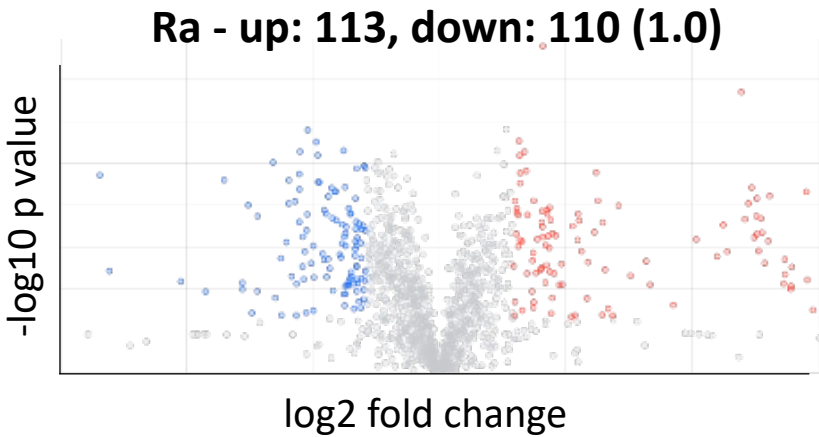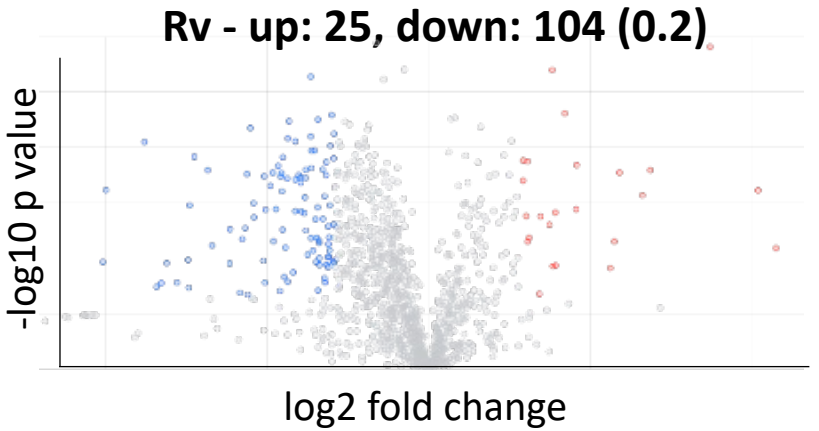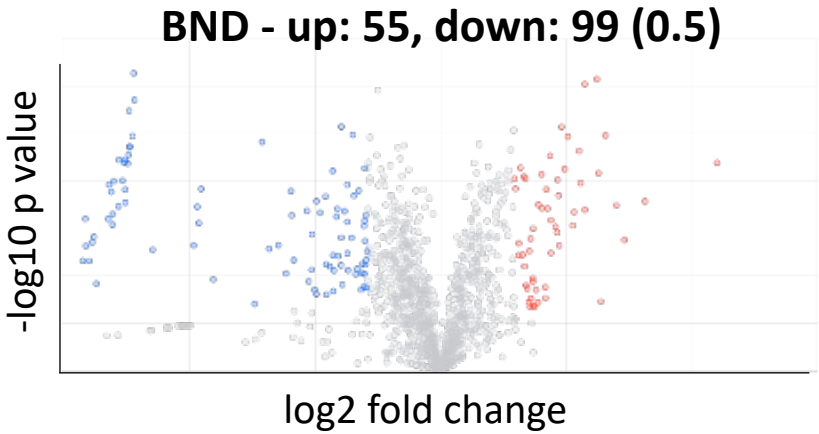

Down-regulated proteins

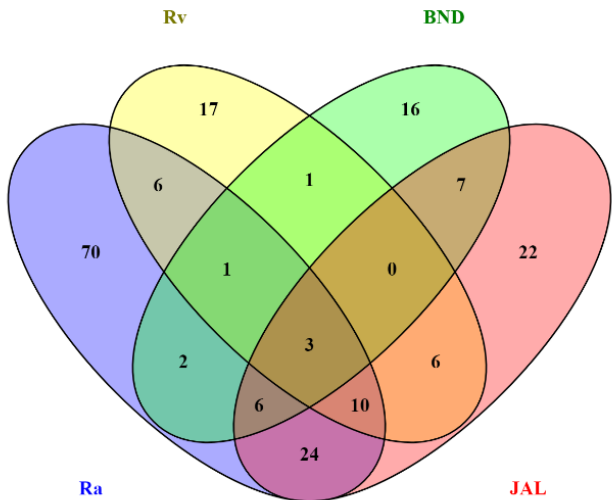

Common virulent

Unique unshared

| Rv-BND | Rv-JAL | BND-JAL | Rv-BND-JAL | Ra | Rv | BND | JAL |
|--------|--------|---------|------------|----|----|-----|-----|
| 1      | 6      | 7       | 0          | 70 | 17 | 16  | 22  |

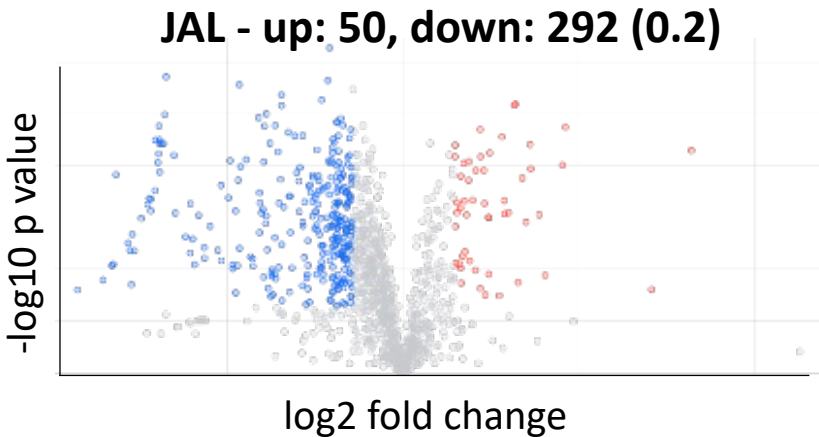



Common virulent - up

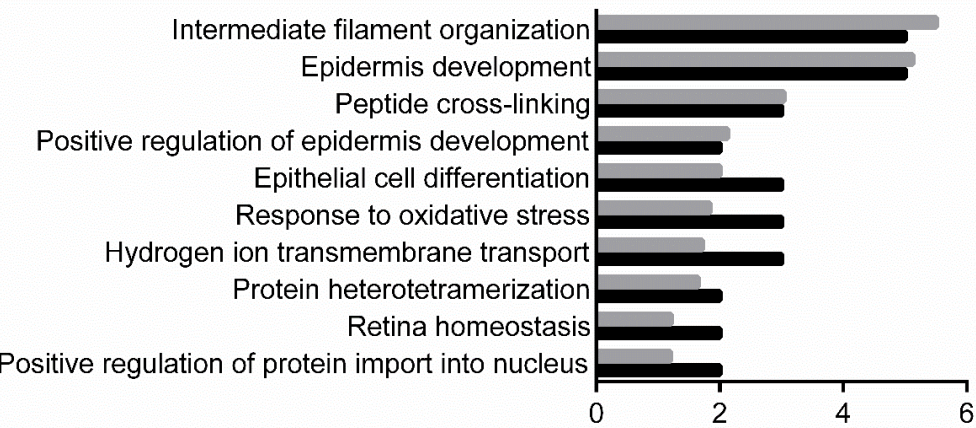

Common virulent - down

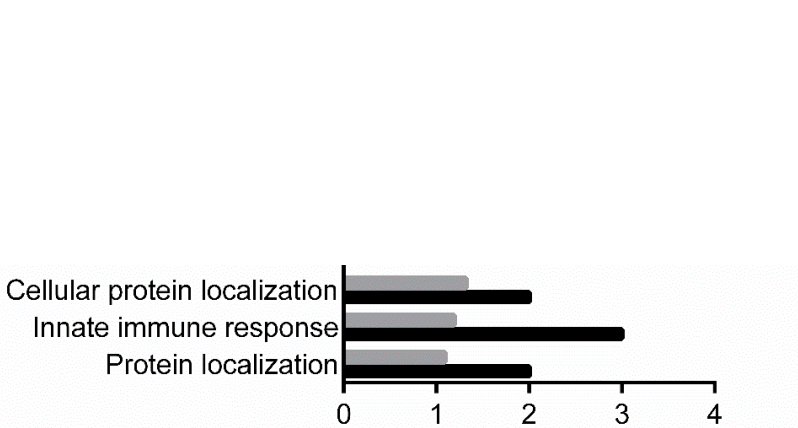

Figure S3

Unique unshared Ra - up

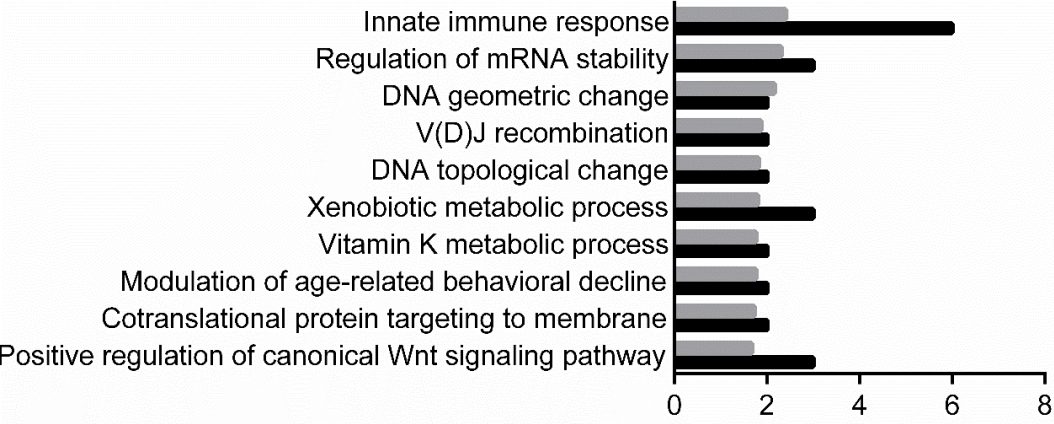

Unique unshared Ra - down

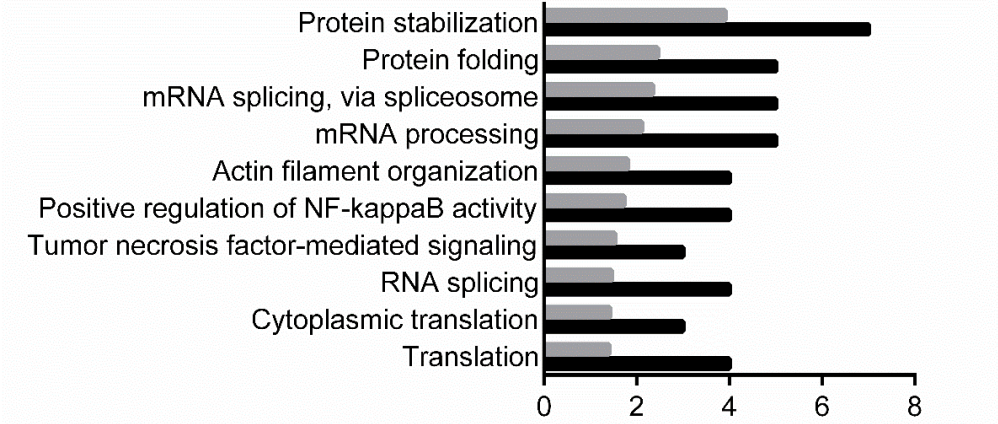

Unique unshared Rv - up

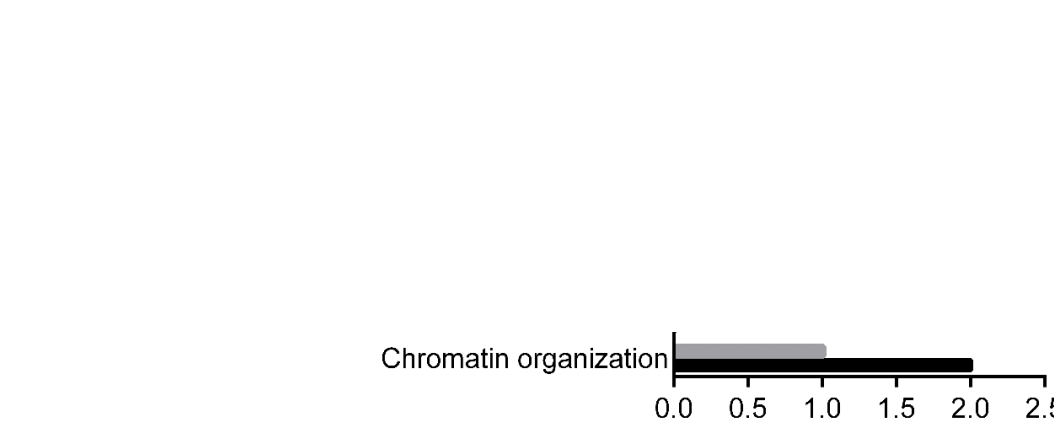

Unique unshared Rv - down

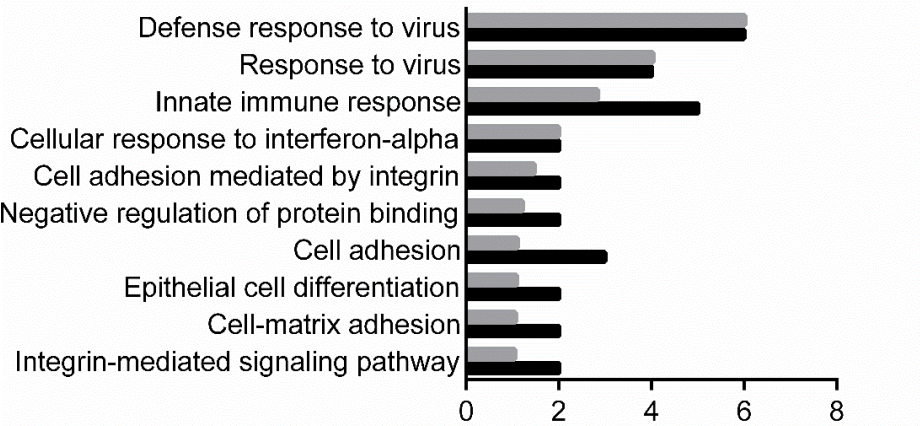

Unique unshared BND - up

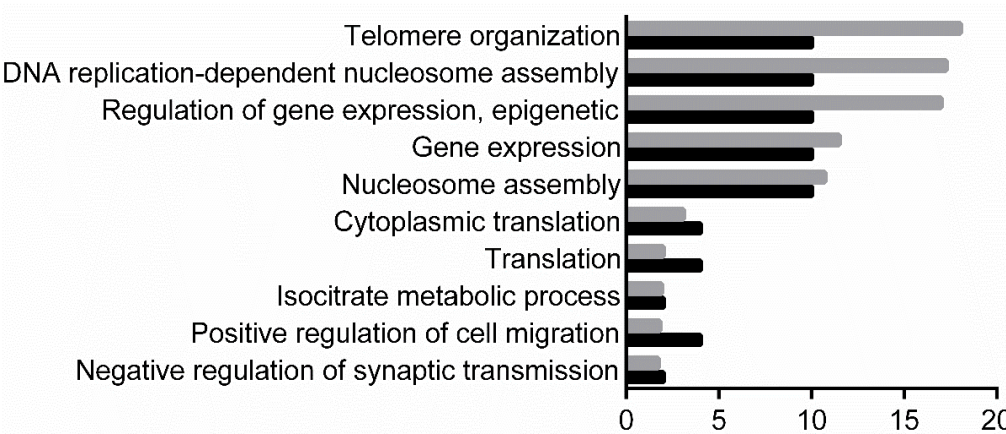

Unique unshared BND - down

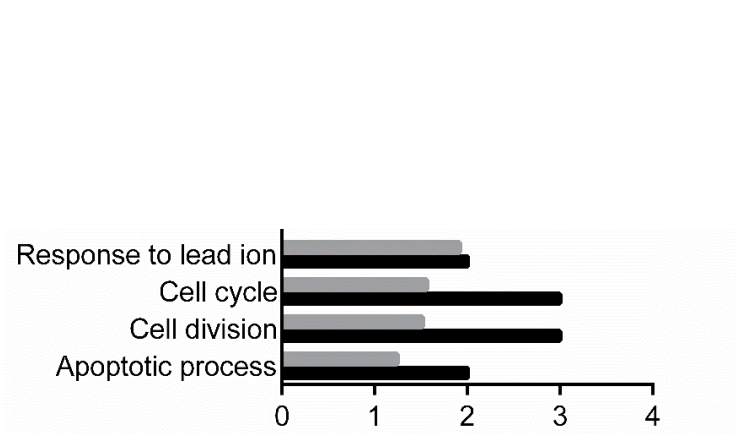

Unique unshared JAL - up

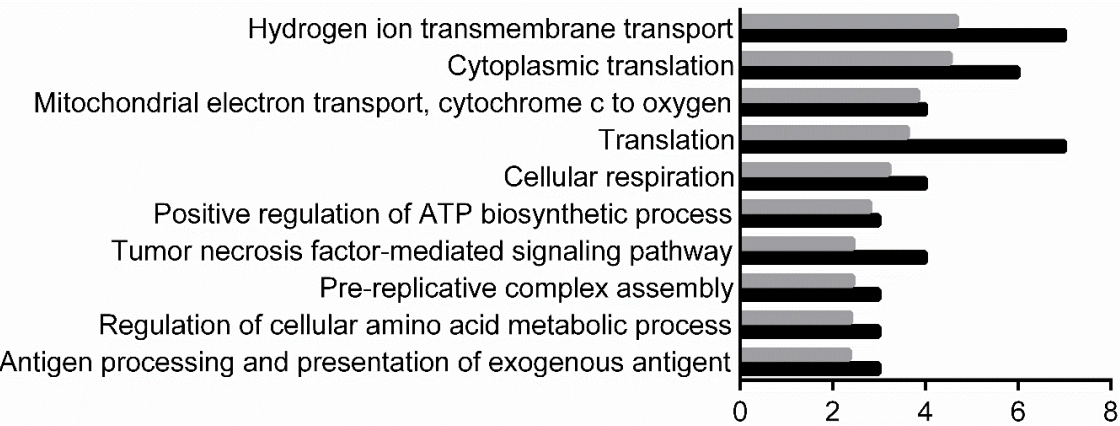

Unique unshared JAL - down

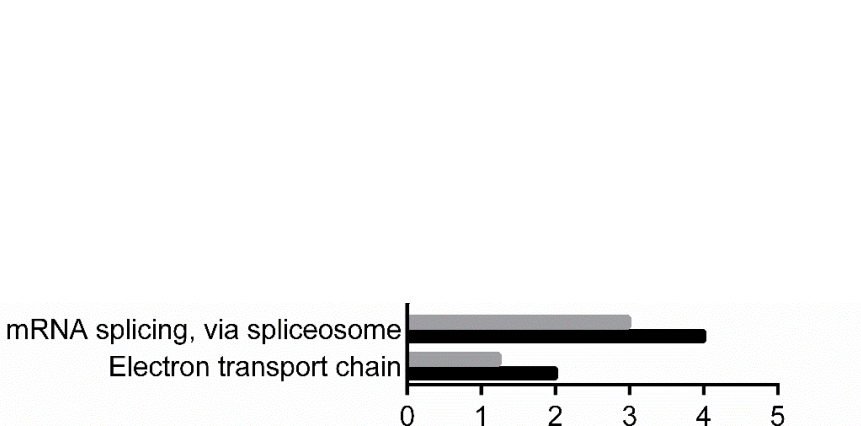

Counts -Log10(p-value)

Counts -Log10(p-value)



Cellular Components - up

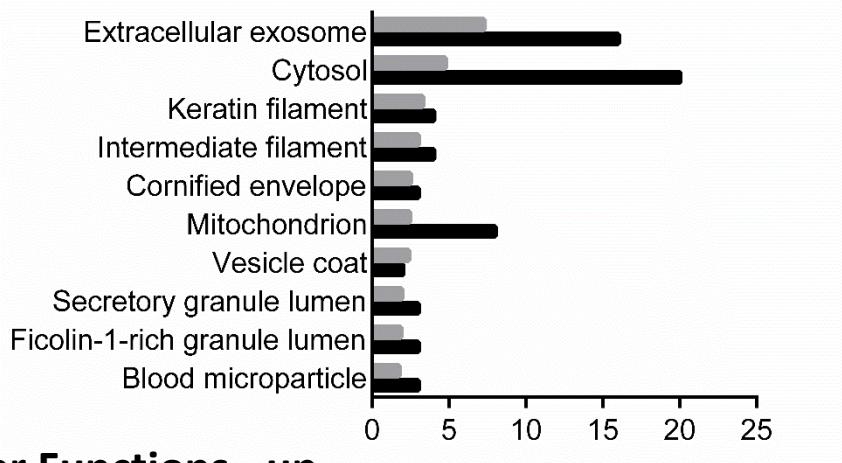

Cellular Components - down

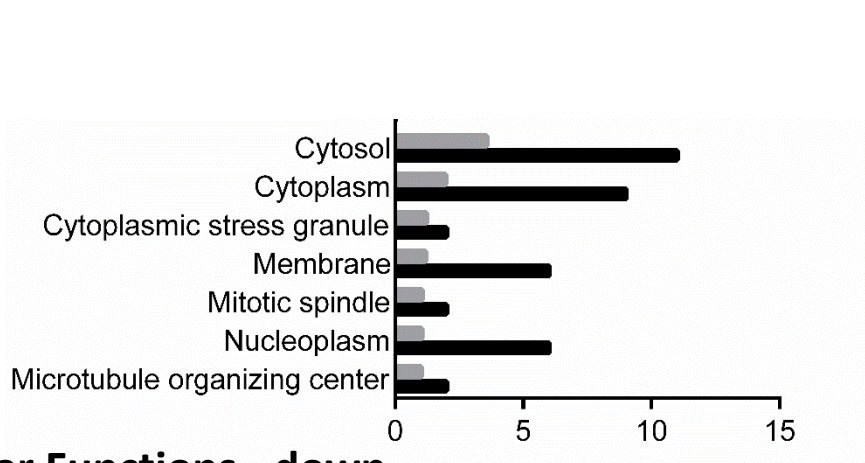

Molecular Functions - up

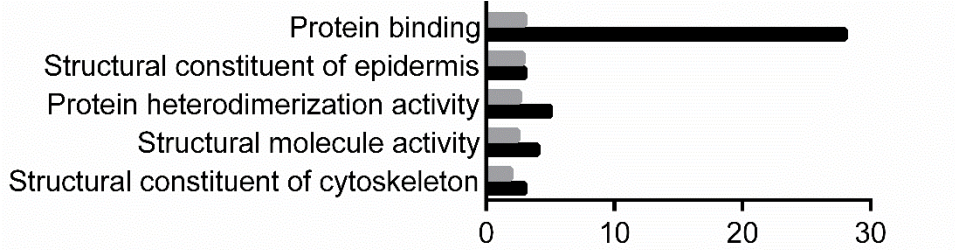

Molecular Functions - down

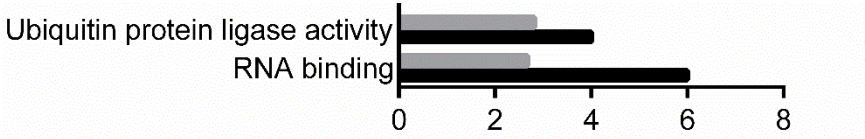

KEGG Pathways - up

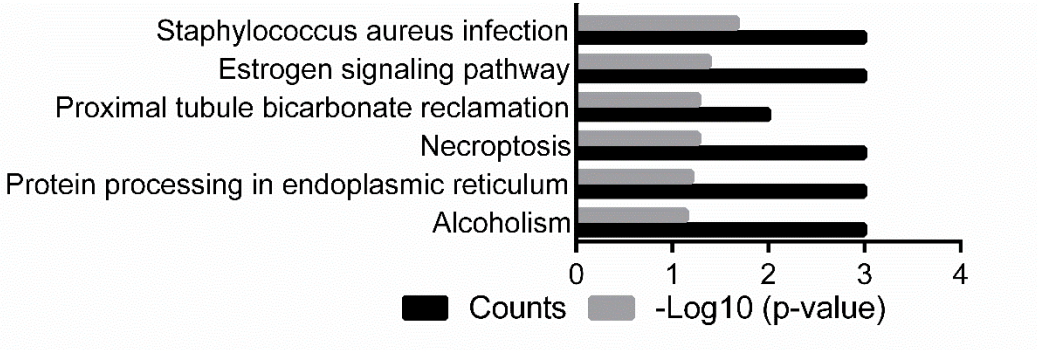

KEGG Pathways - down

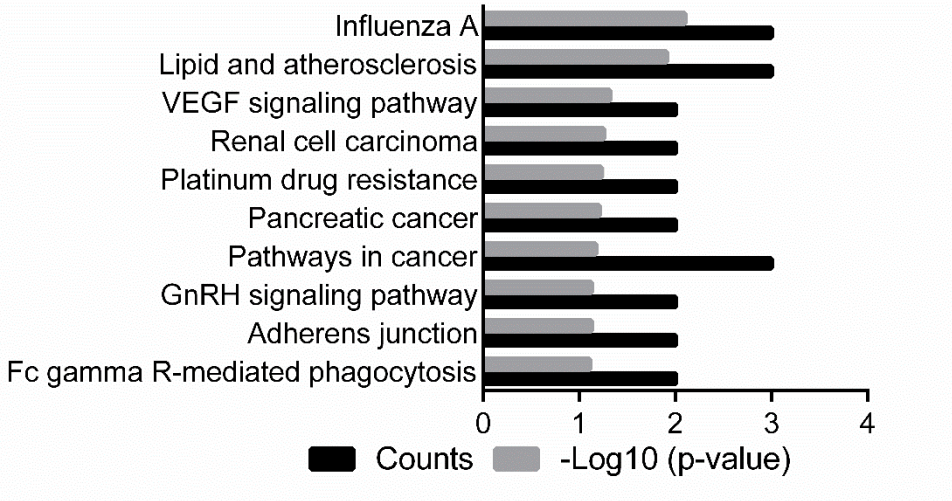

PPI Networks

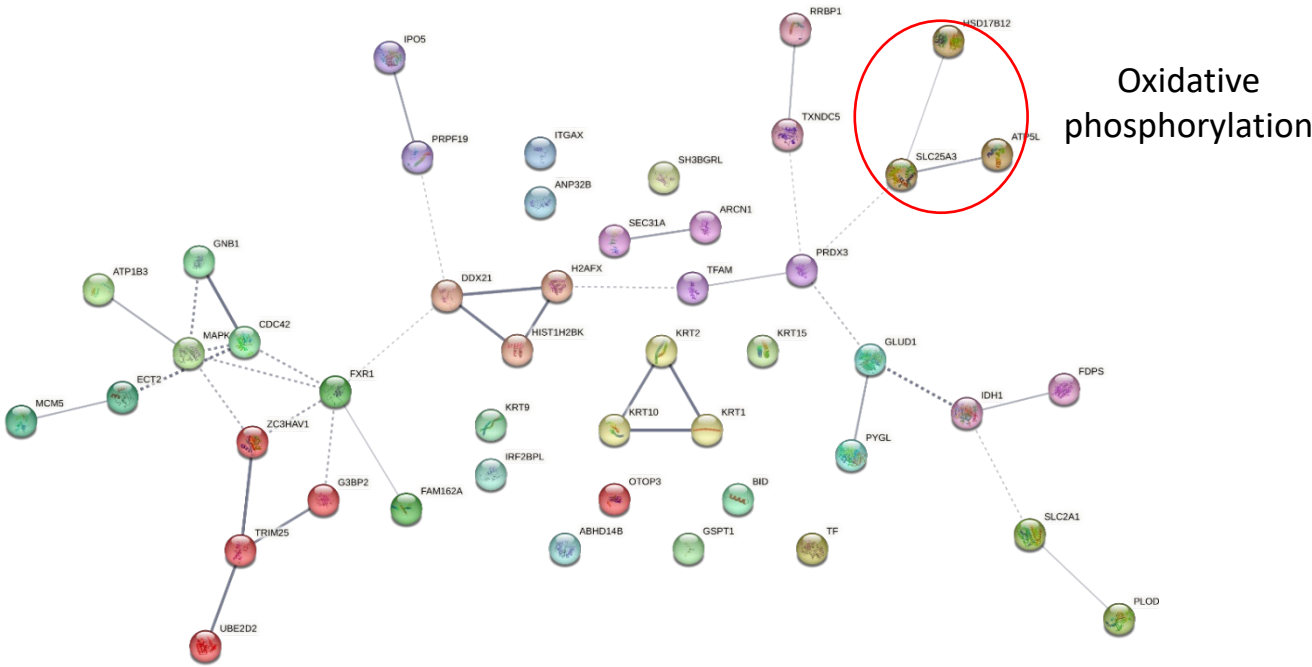



Differential proteins

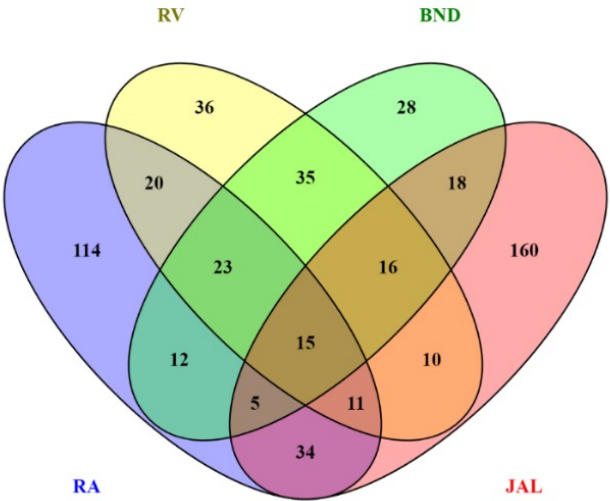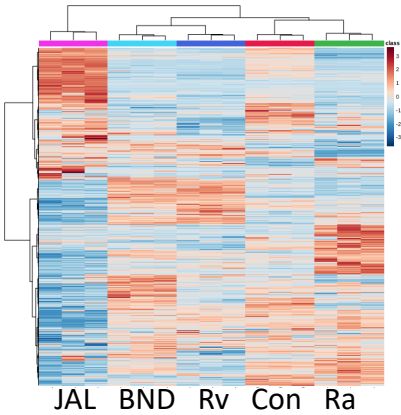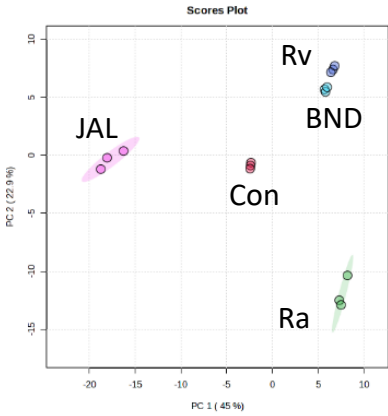

Common virulent

Unique unshared

| Rv-BND | Rv-JAL | BND-JAL | Rv-BND-JAL | Ra  | Rv | BND | JAL |
|--------|--------|---------|------------|-----|----|-----|-----|
| 35     | 10     | 18      | 16         | 114 | 36 | 28  | 160 |

Up-regulated proteins

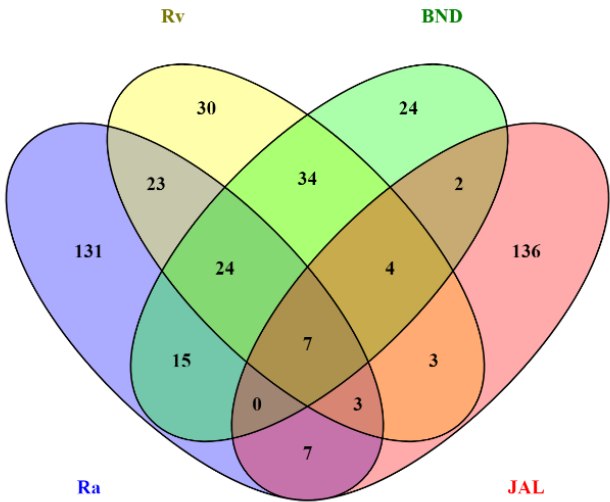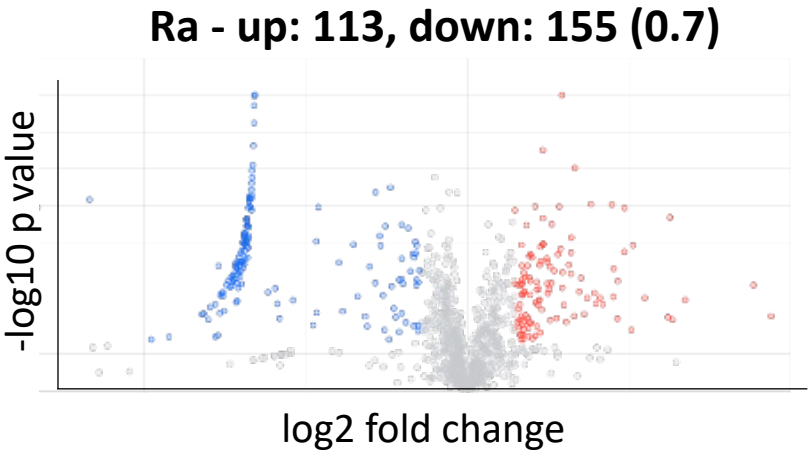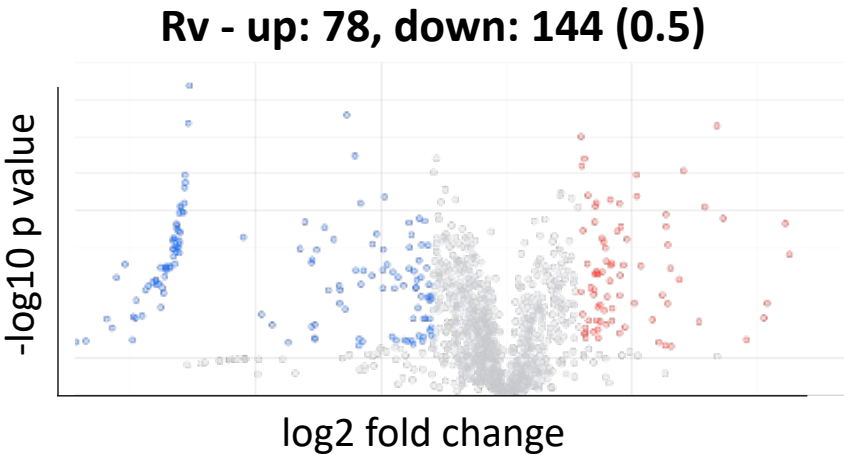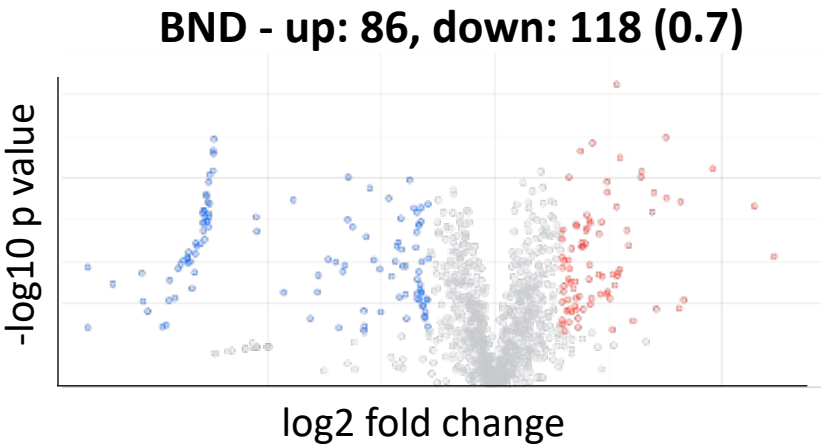

Down-regulated proteins

D

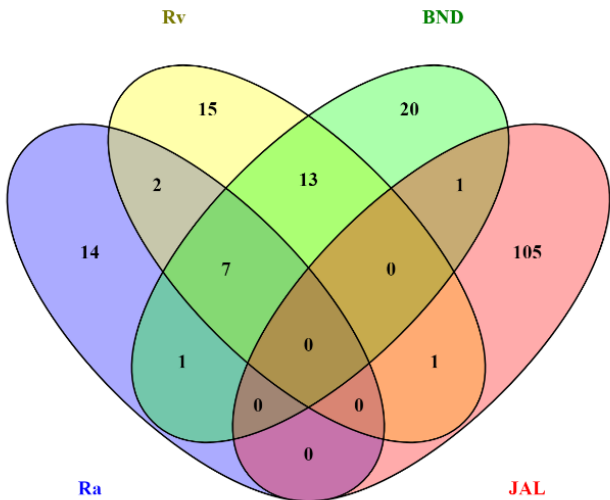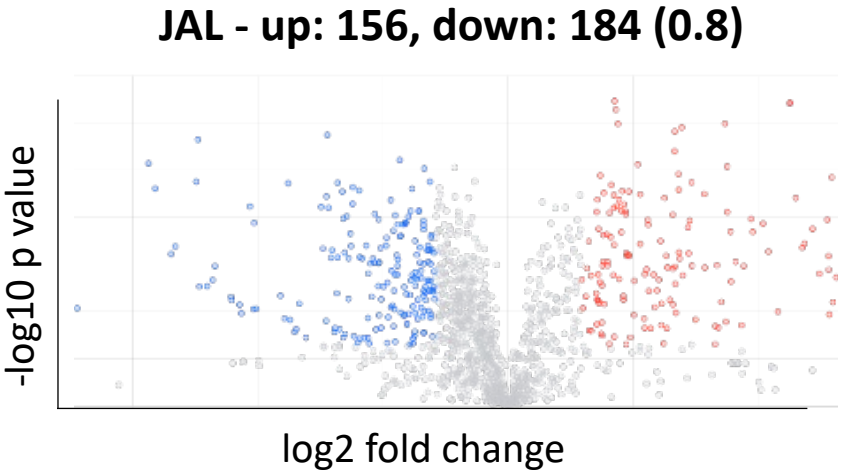

Common virulent

Unique unshared

| Rv-BND | Rv-JAL | BND-JAL | Rv-BND-JAL | Ra | Rv | BND | JAL |
|--------|--------|---------|------------|----|----|-----|-----|
| 13     | 1      | 1       | 0          | 14 | 15 | 20  | 105 |

Differential proteins

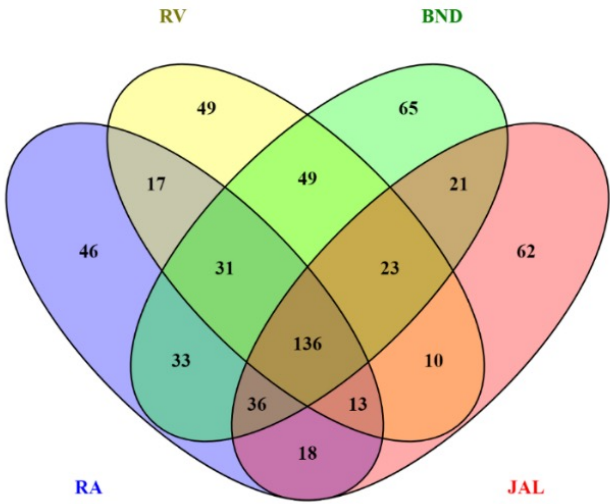

Common virulent

Unique unshared

| Rv-BND | Rv-JAL | BND-JAL | Rv-BND-JAL | Ra | Rv | BND | JAL |
|--------|--------|---------|------------|----|----|-----|-----|
| 49     | 10     | 21      | 23         | 46 | 49 | 65  | 62  |

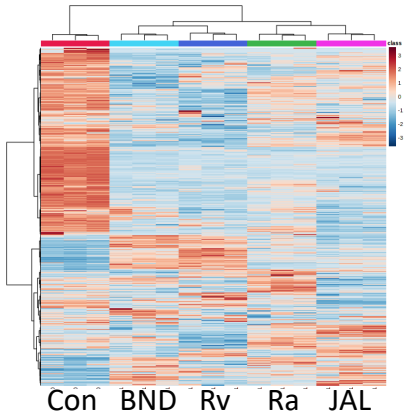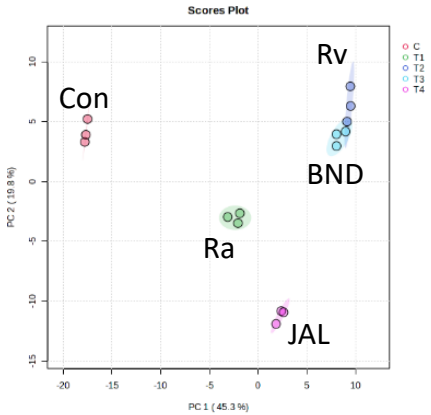

Up-regulated proteins

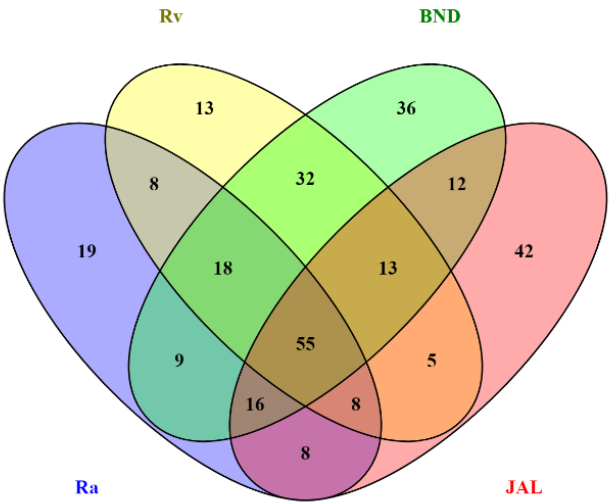

Common virulent

Unique unshared

| Rv-BND | Rv-JAL | BND-JAL | Rv-BND-JAL | Ra | Rv | BND | JAL |
|--------|--------|---------|------------|----|----|-----|-----|
| 32     | 5      | 12      | 13         | 19 | 13 | 36  | 42  |

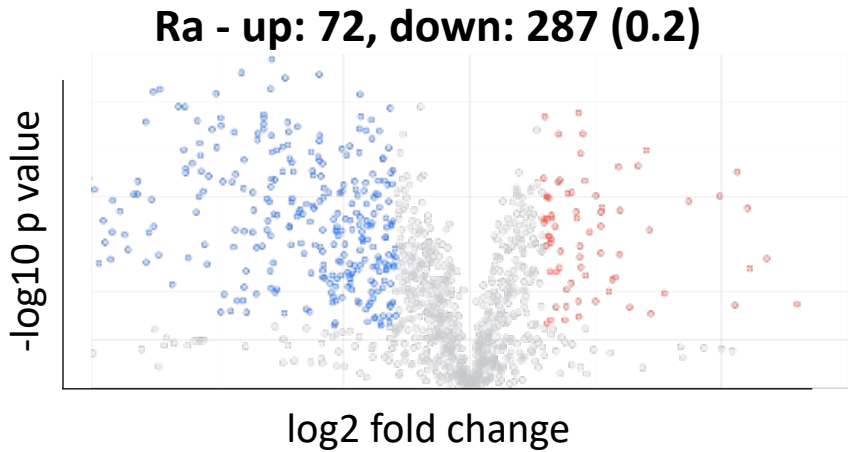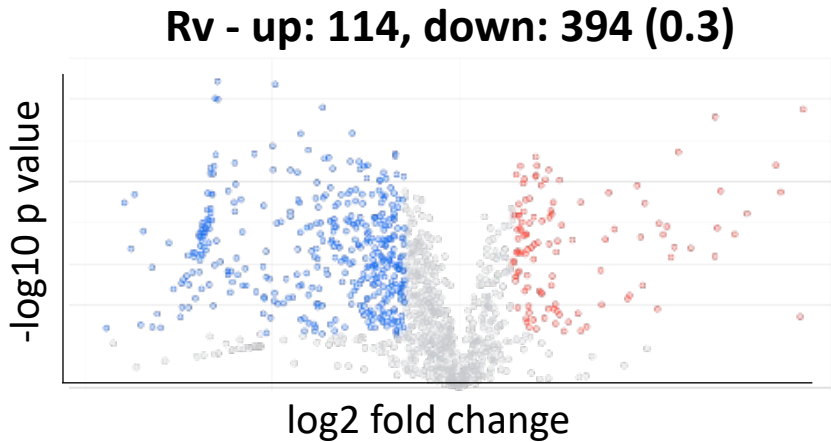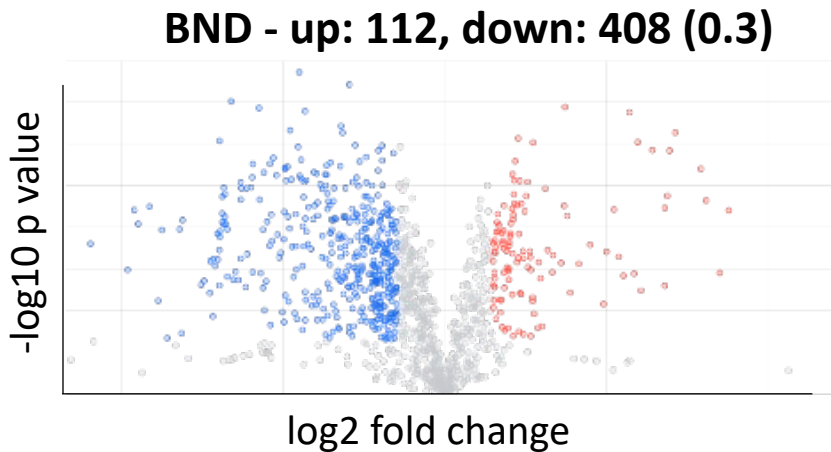

Down-regulated proteins

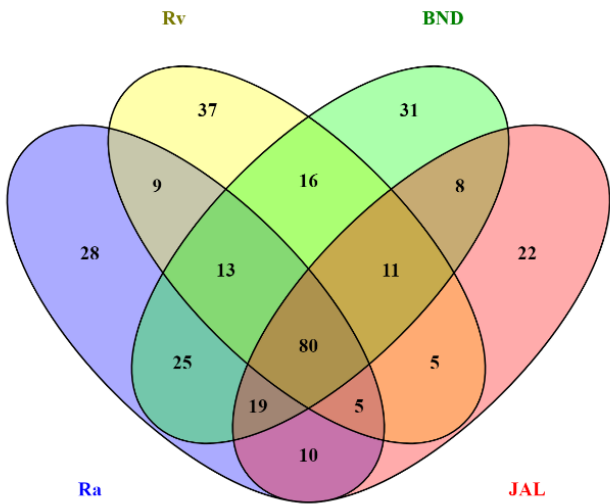

Common virulent

Unique unshared

| Rv-BND | Rv-JAL | BND-JAL | Rv-BND-JAL | Ra | Rv | BND | JAL |
|--------|--------|---------|------------|----|----|-----|-----|
| 16     | 5      | 8       | 11         | 28 | 37 | 31  | 22  |

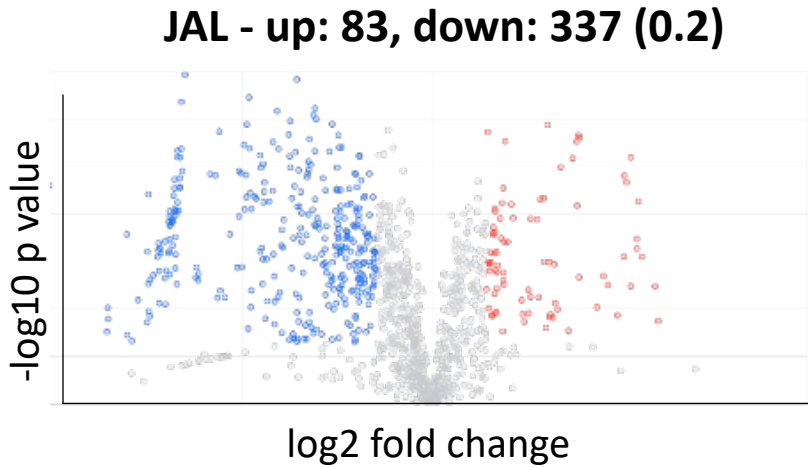



Common virulent - up

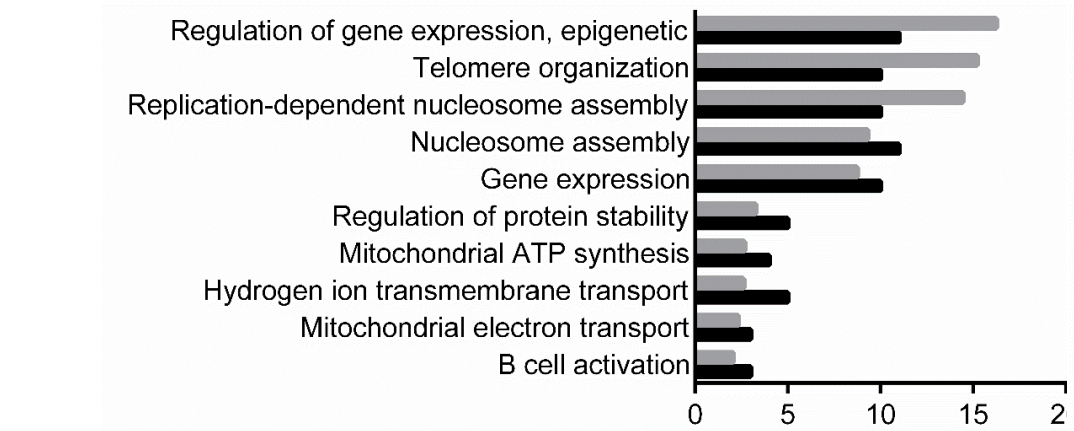

Common virulent - down

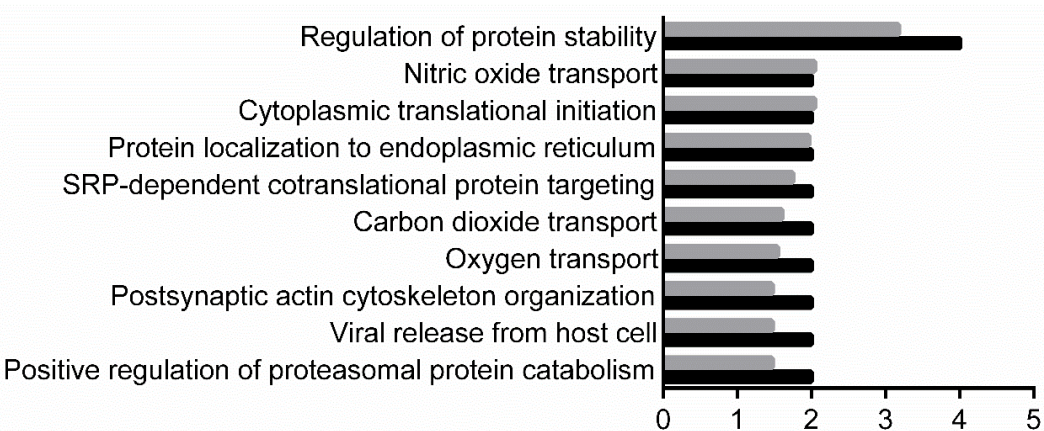

Figure S7

Unique unshared Ra - up

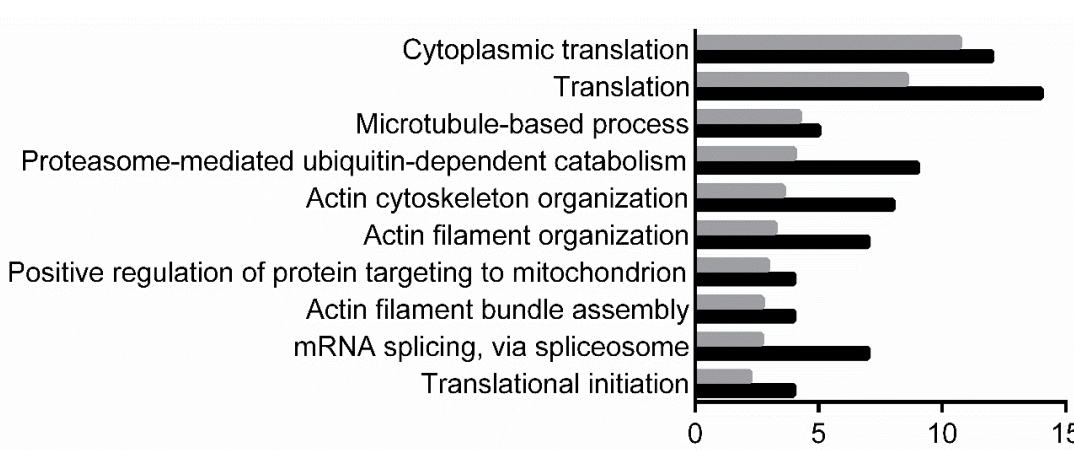

Unique unshared Ra - down

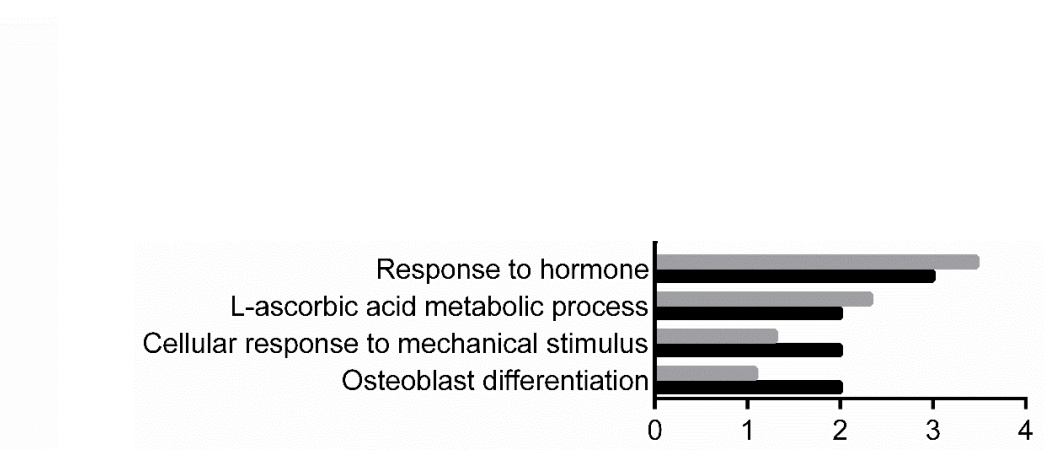

Unique unshared Rv - up

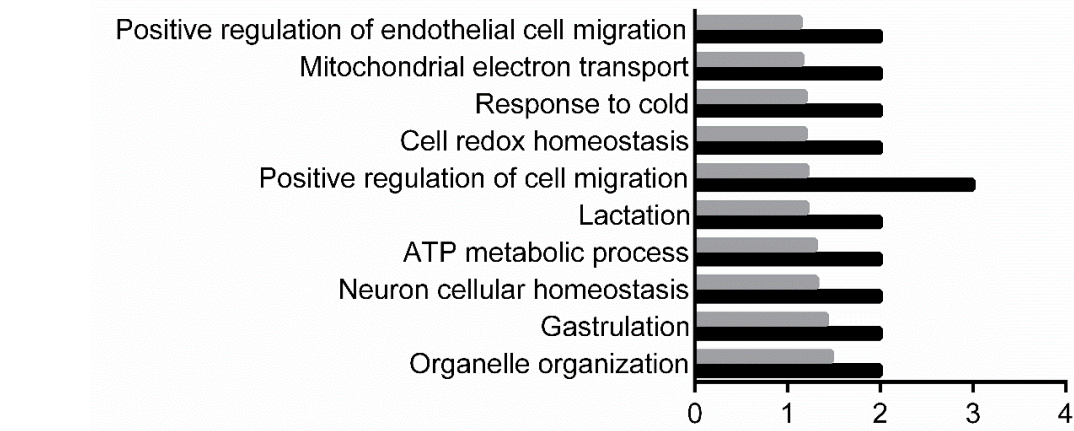

Unique unshared Rv - down

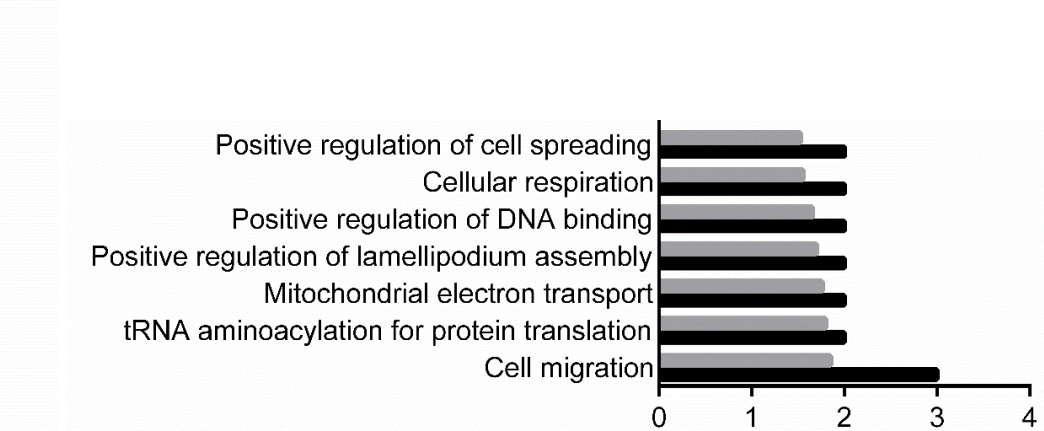

Unique unshared BND - up

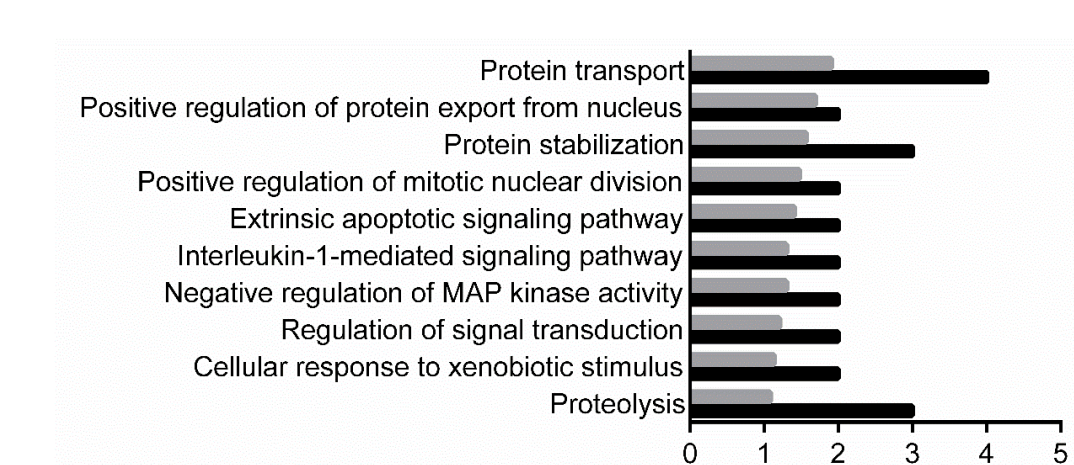

Unique unshared BND - down

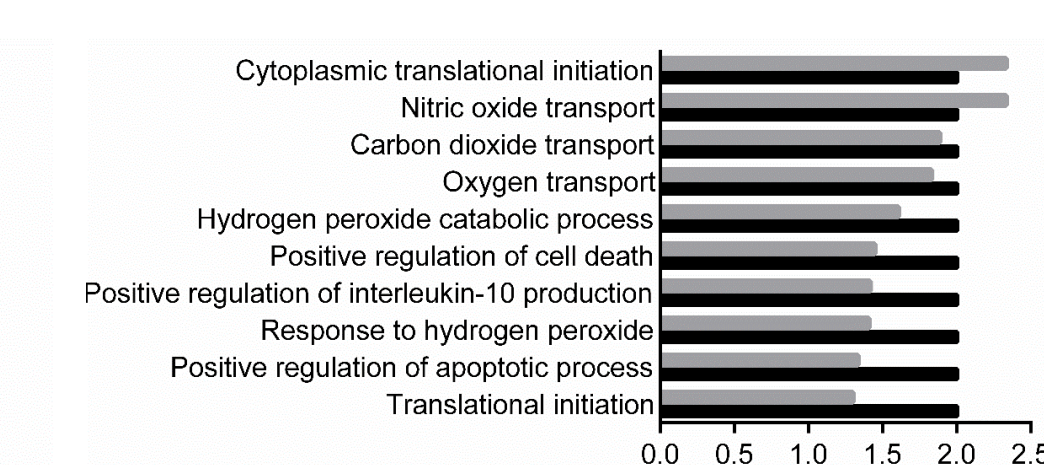

Unique unshared JAL - up

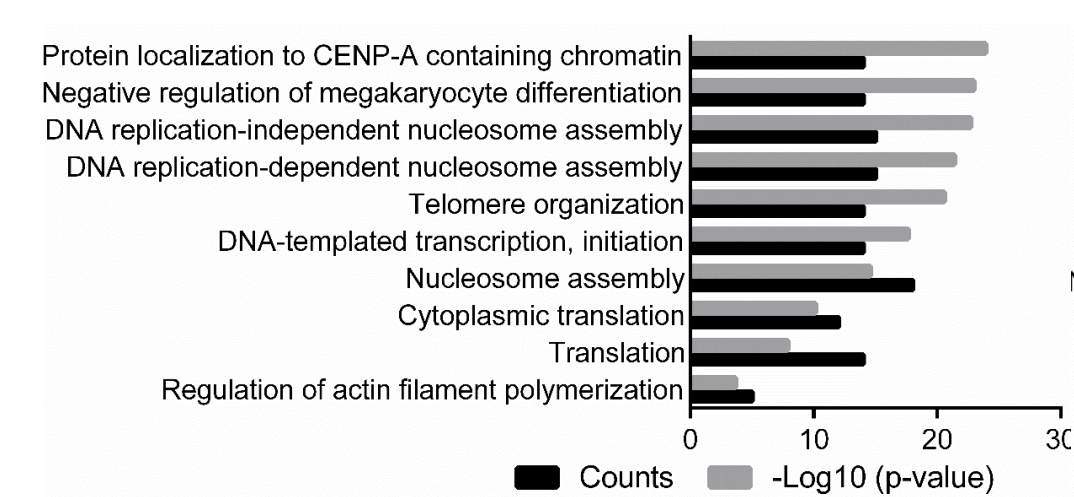

Unique unshared JAL - down

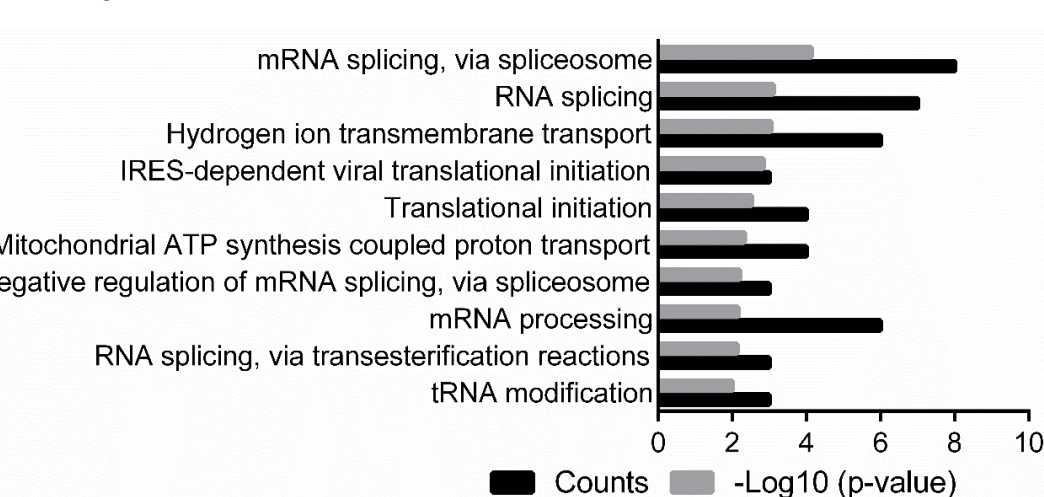

Counts -Log10(p-value)

Counts -Log10(p-value)



Cellular Components - up

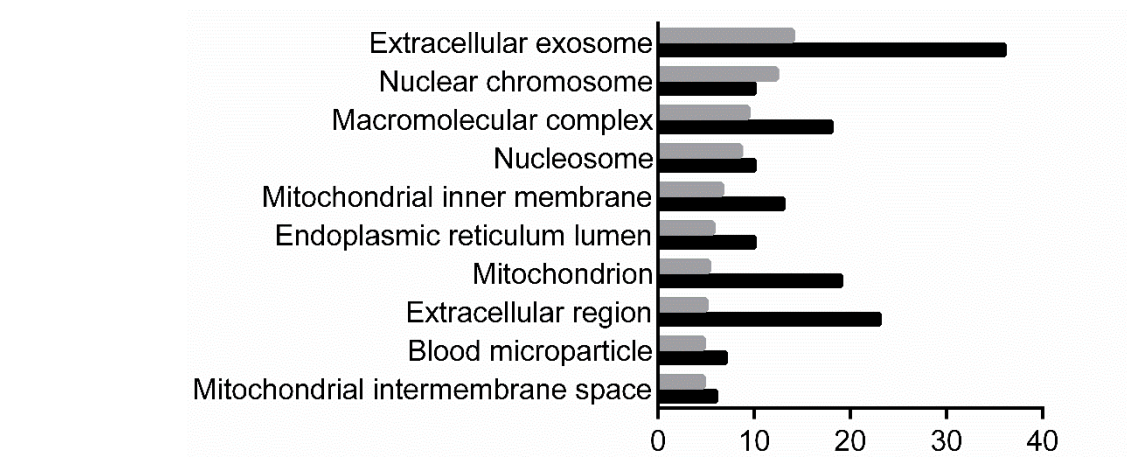

Cellular Components - down

Figure S8

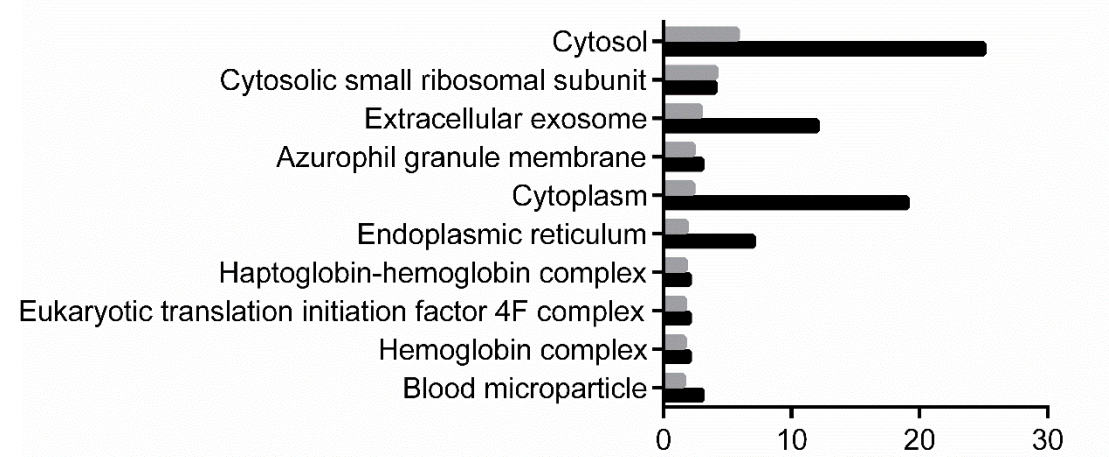

Molecular Functions - up

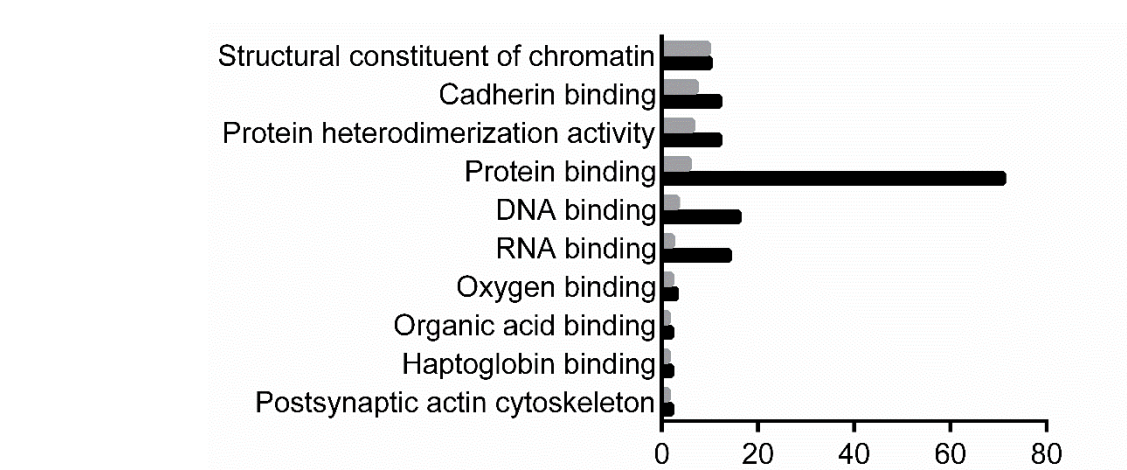

Molecular Functions - down

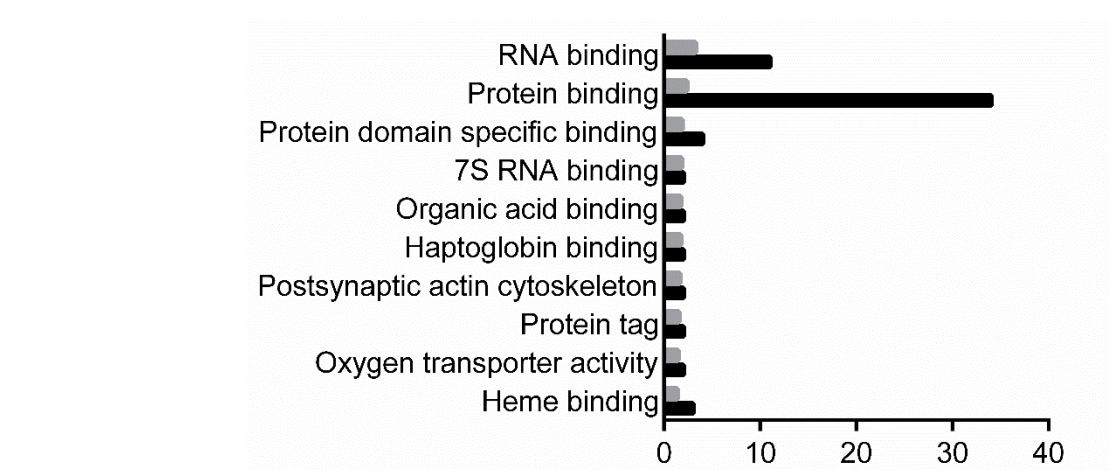

KEGG Pathways - up

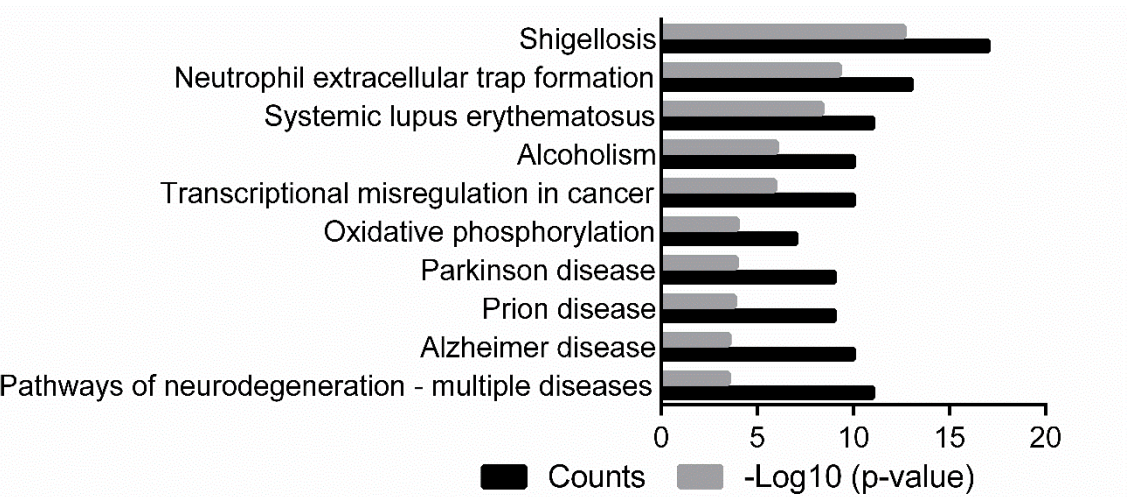

KEGG Pathways - down

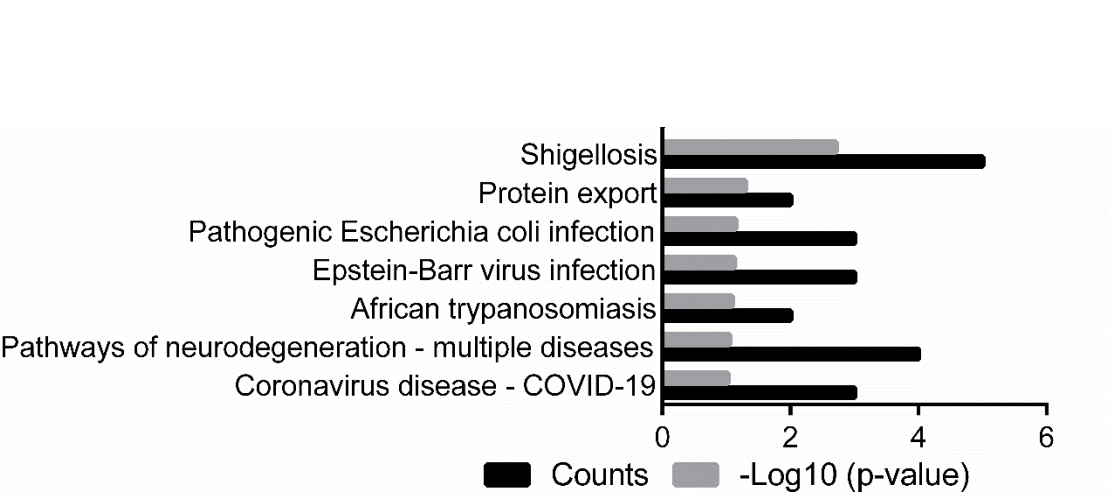

PPI Networks

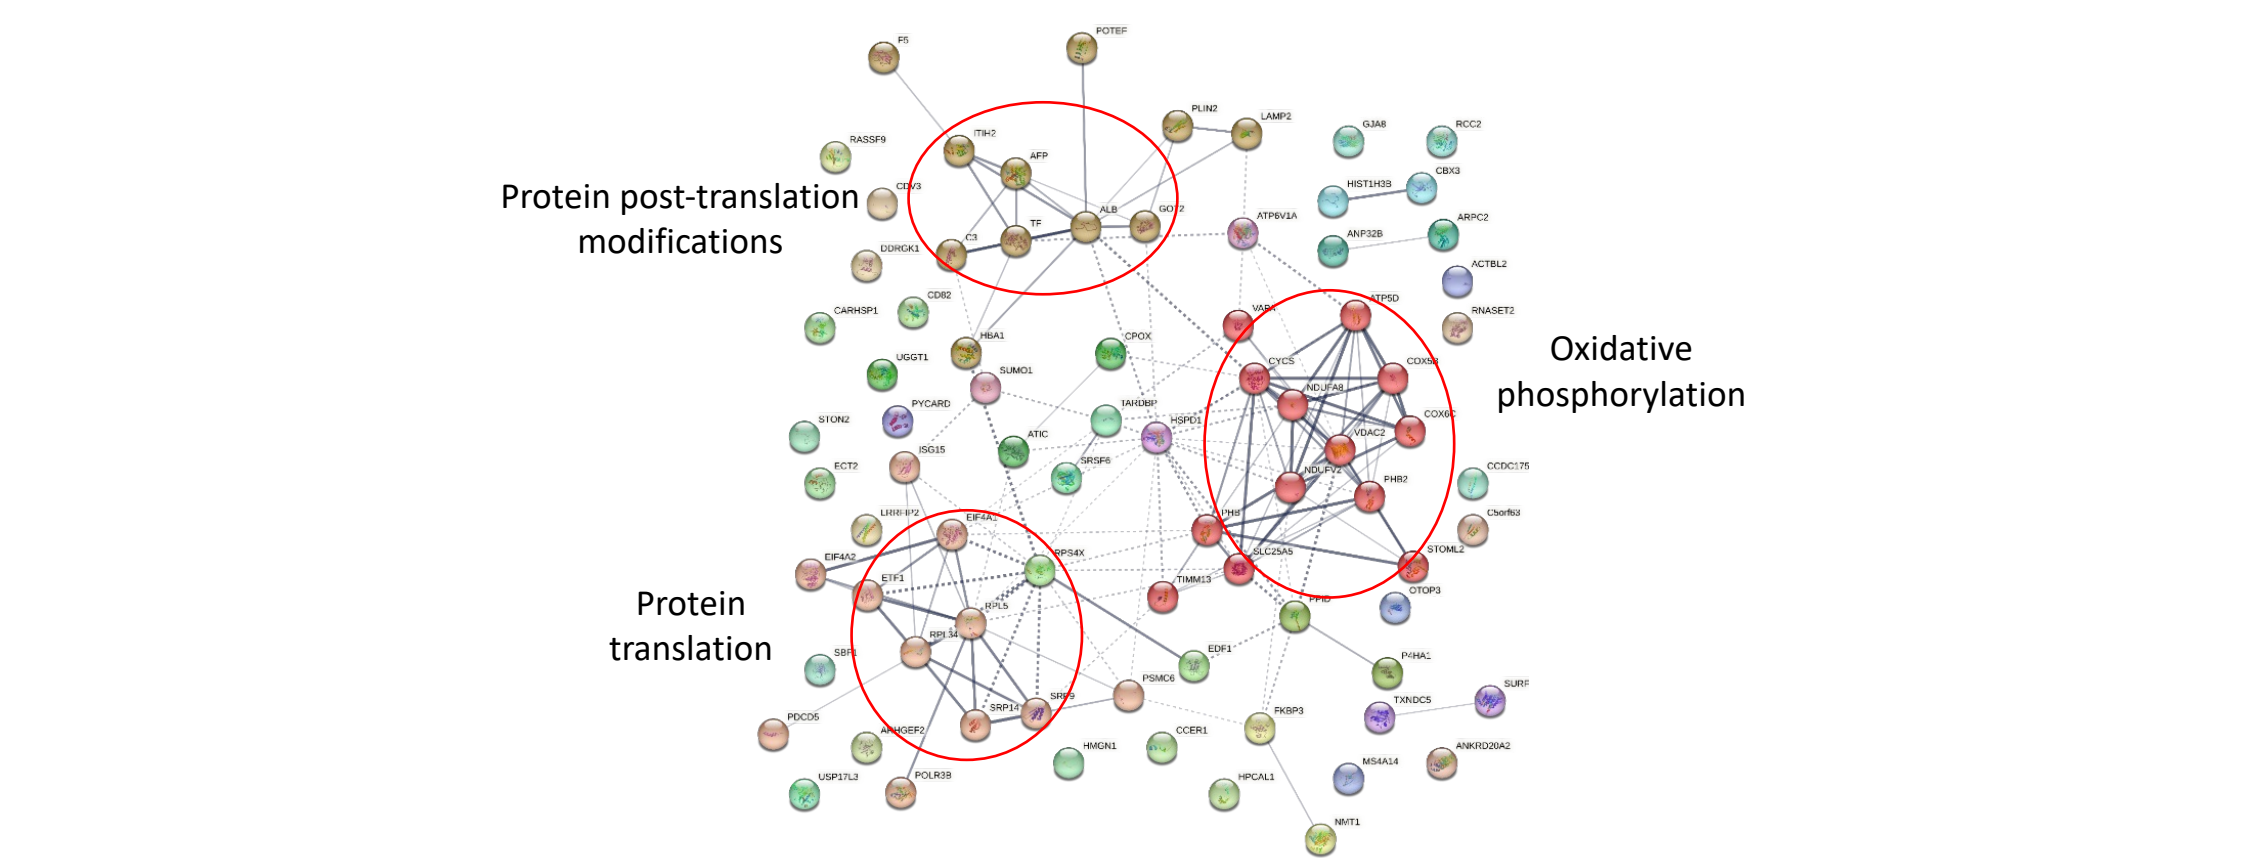



Common virulent - up

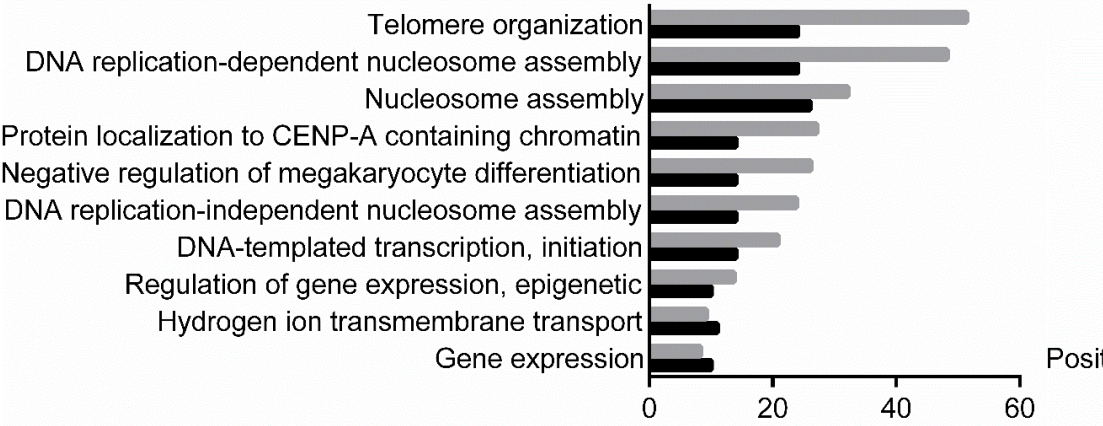

Common virulent - down

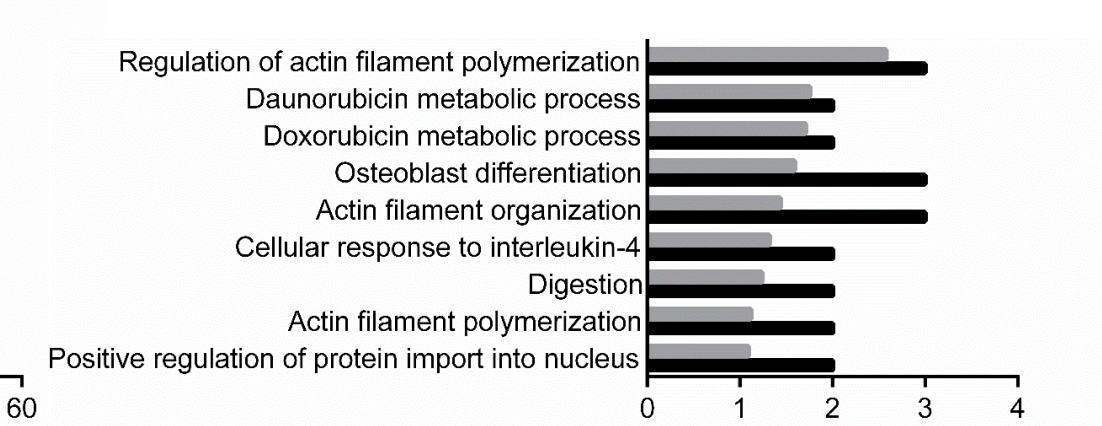

Figure S9

Unique unshared Ra - up

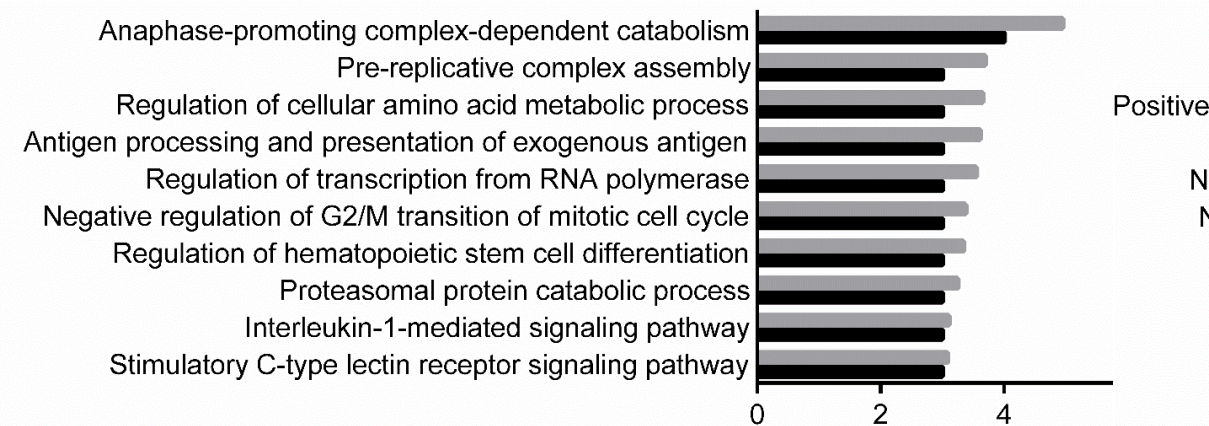

Unique unshared Ra - down

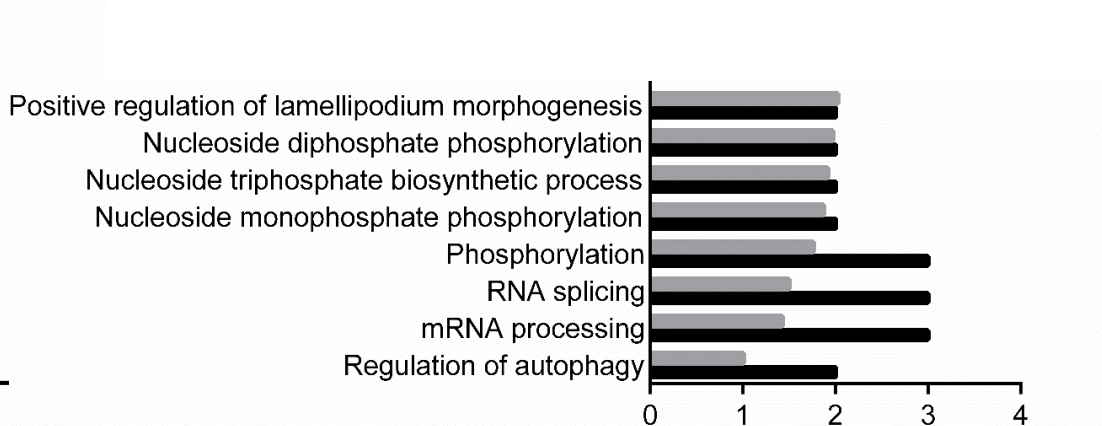

Unique unshared Rv - up

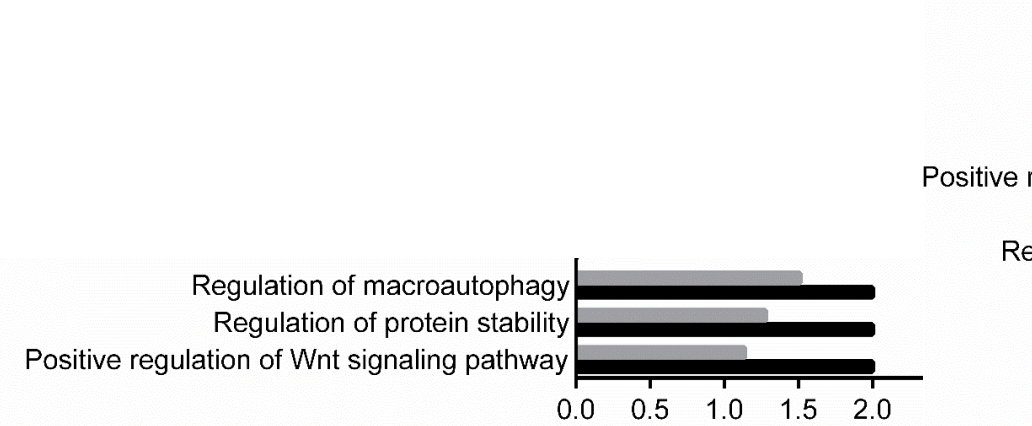

Unique unshared Rv - down

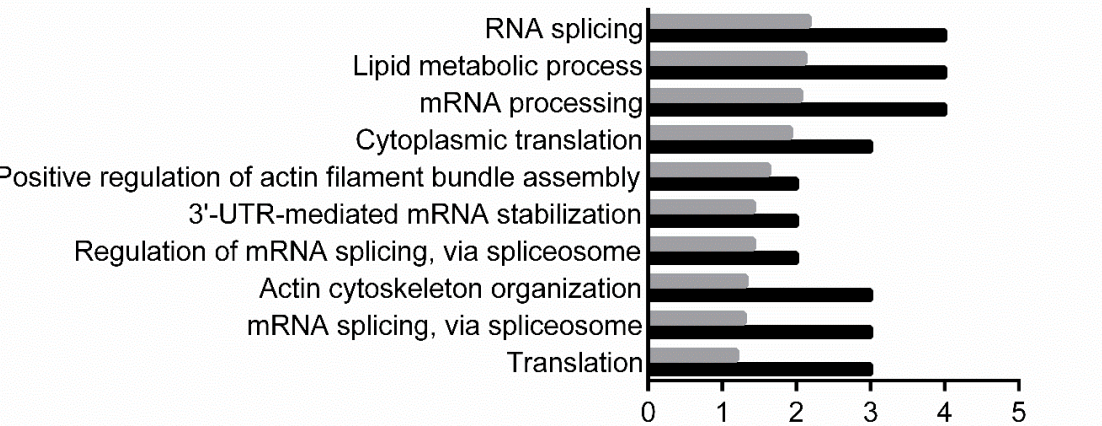

Unique unshared BND - up

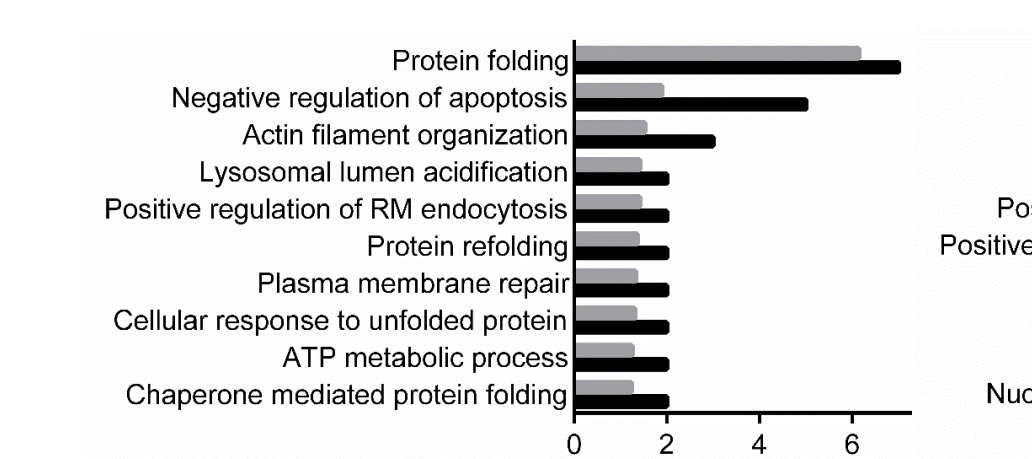

Unique unshared BND - down

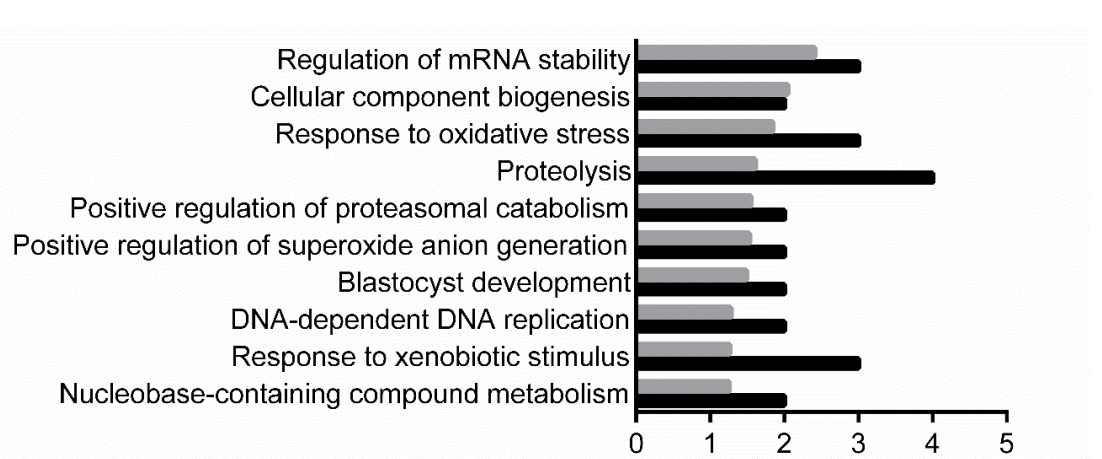

Unique unshared JAL - up

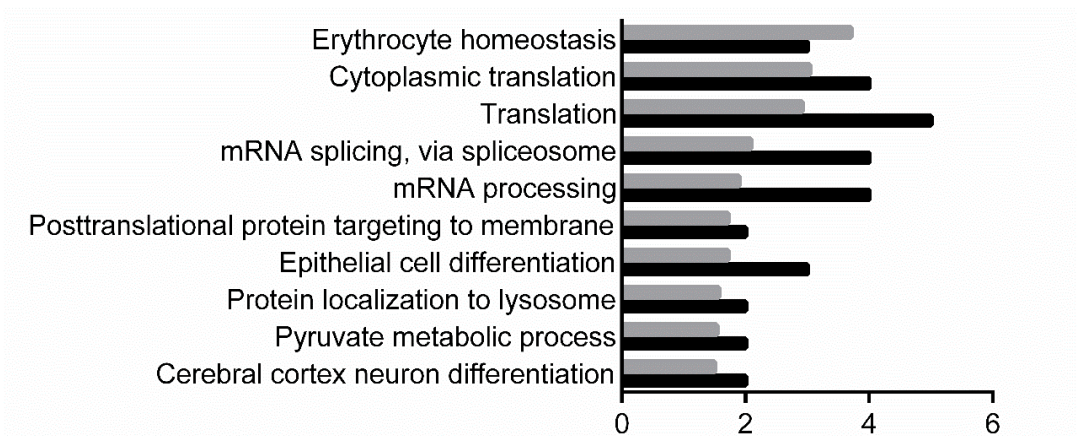

Unique unshared JAL - down

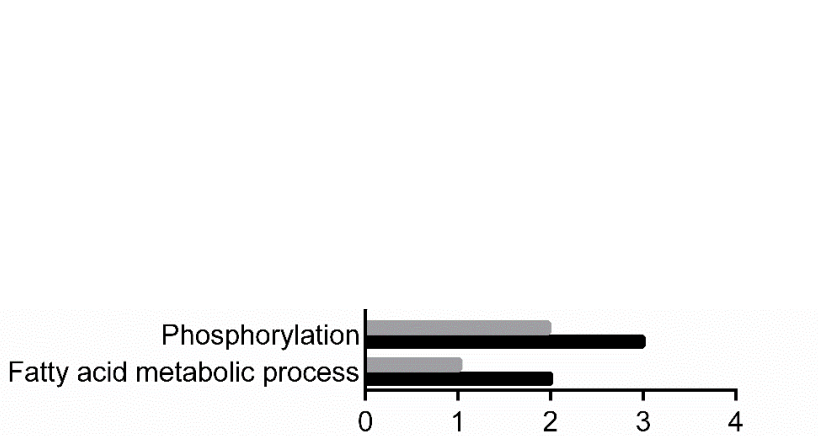

Counts -Log10(p-value)

Counts -Log10(p-value)



Cellular Components - up

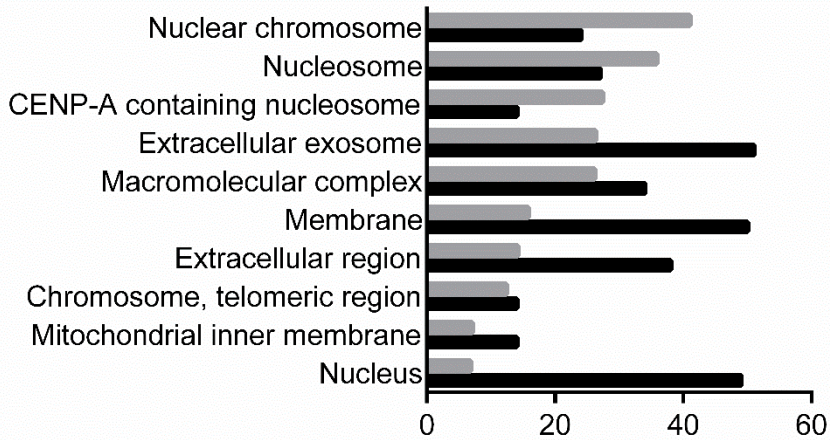

Cellular Components - down

Figure S10

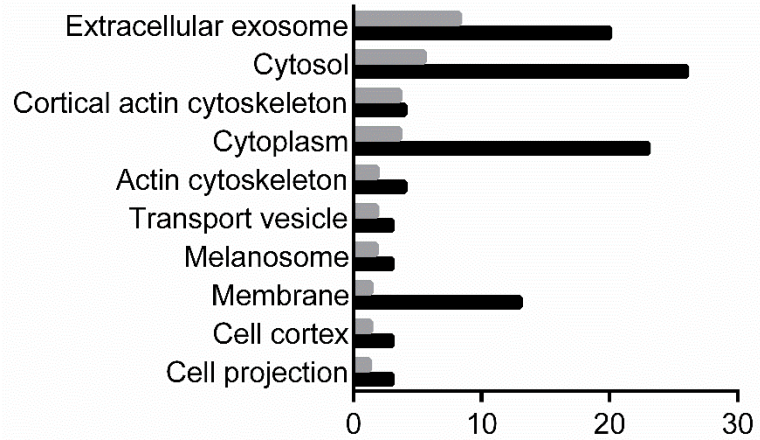

Molecular Functions - up

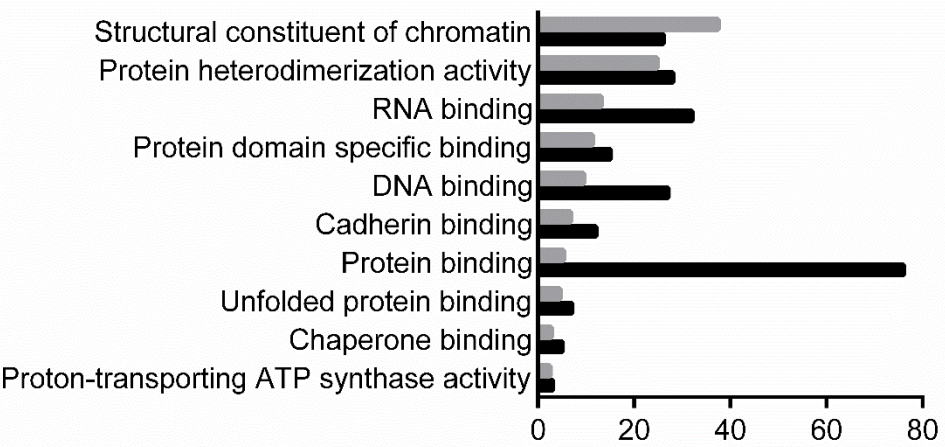

Molecular Functions - down

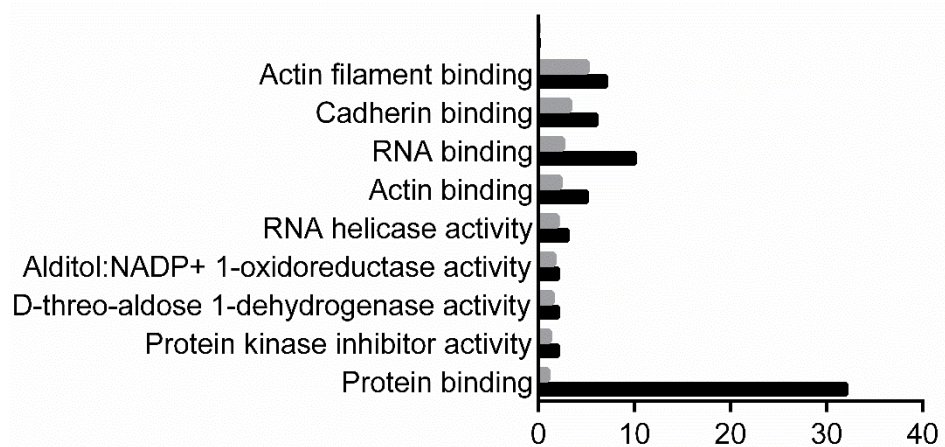

KEGG Pathways - up

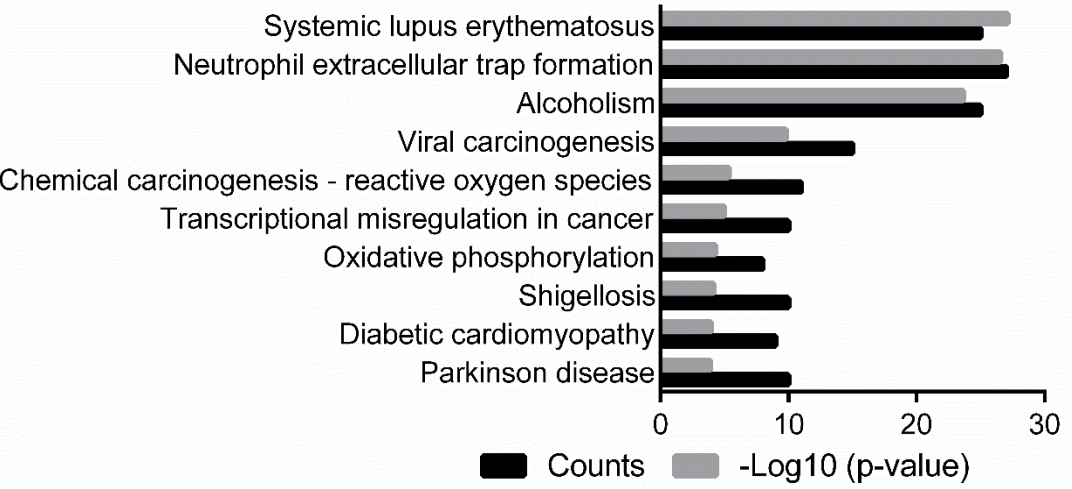

KEGG Pathways - down

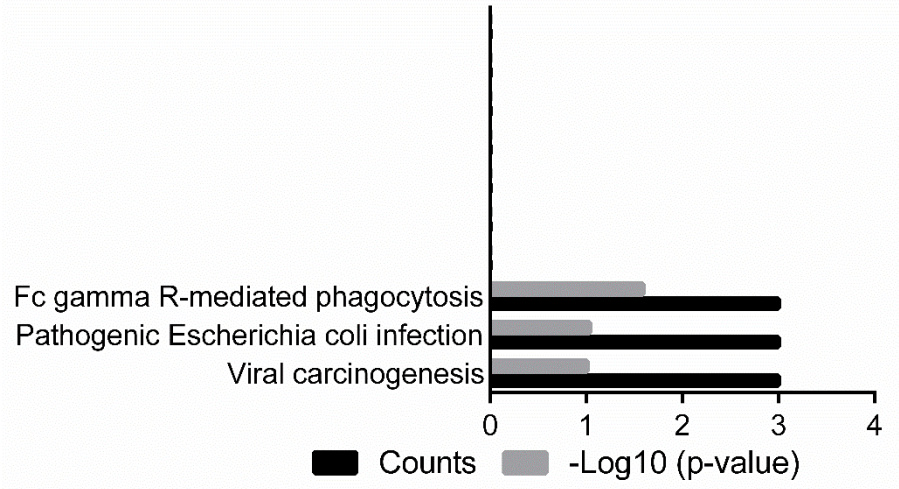

Counts -Log10(p-value)

Counts -Log10(p-value)

PPI Networks

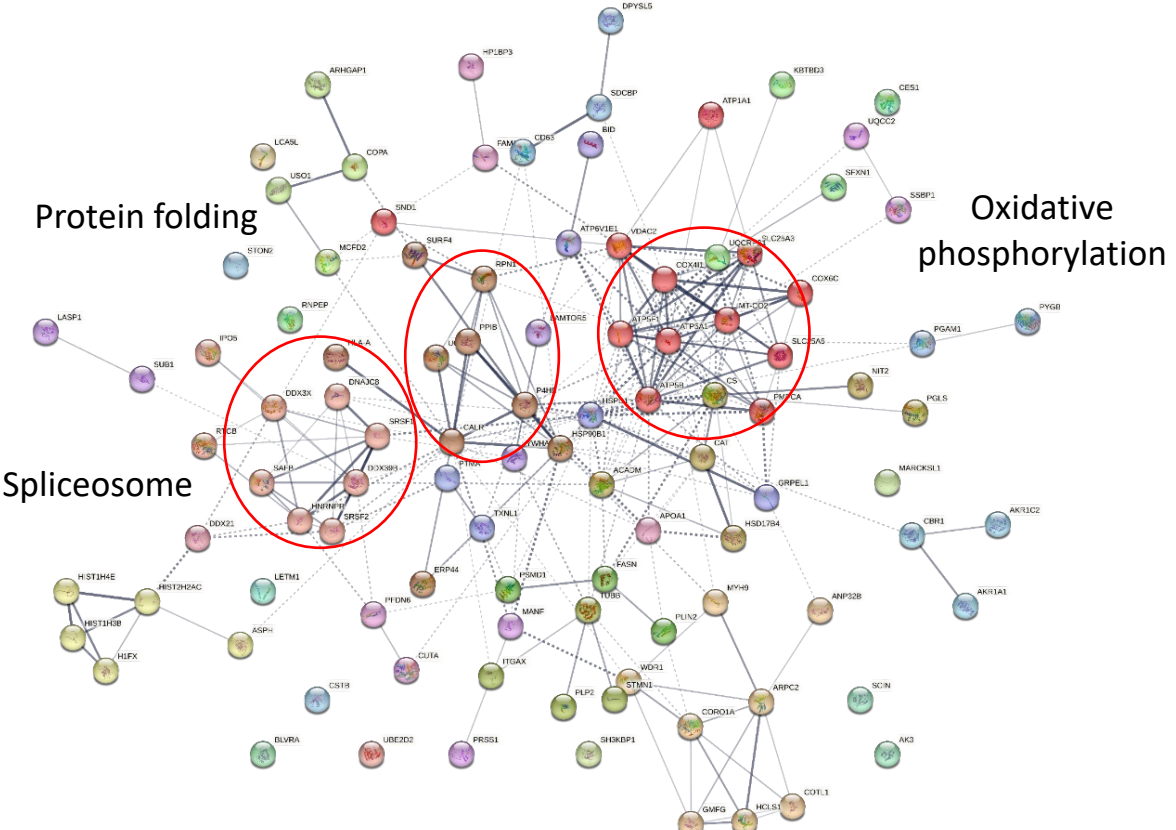



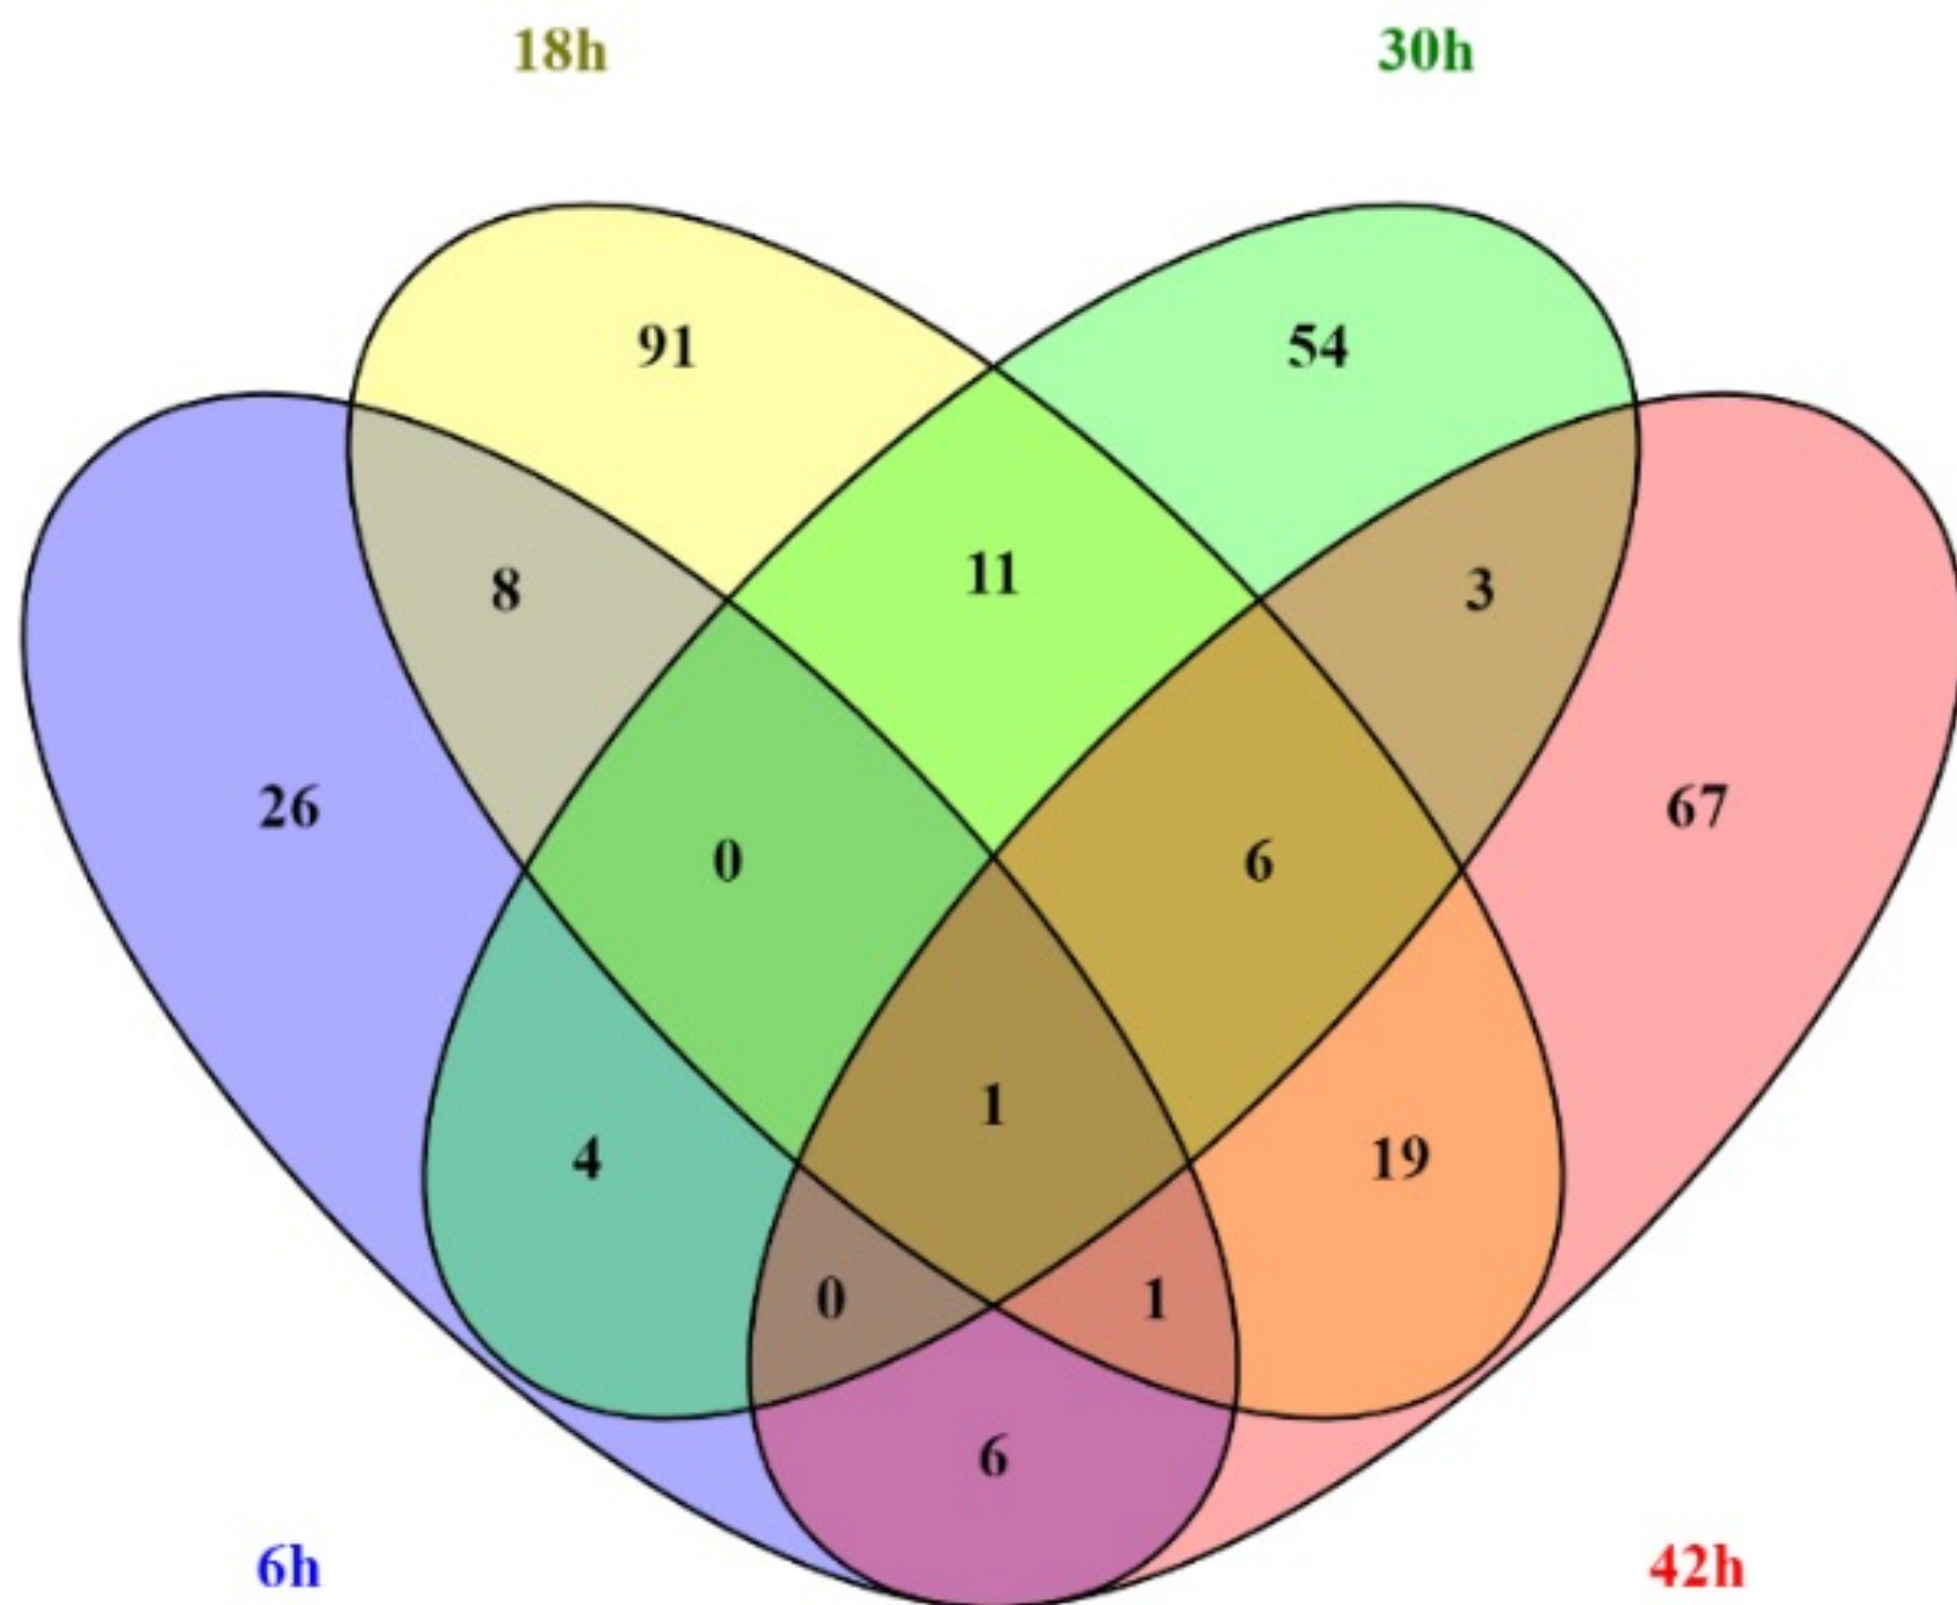

Supplement: s1 [file s1]
